# Supplementary material for: Mycophenolate mofetil reduces the branching of microglial processes
Source: Mol Brain. 2026 Jan 11;19:12. doi: 10.1186/s13041-025-01271-1 (PMC12882203; doi:10.1186/s13041-025-01271-1)
Supplement: Supplementary file 1 — Additional file1. [file 13041_2025_1271_MOESM1_ESM.xlsx]

## Sheet: Fig.1E_IMS(GMP)
Ctrl1			Ctrl2			Ctrl3			MMF1			MMF2			MMF3
Average	56.8994		Average	68.1701		Average	77.7561		Average	32.5106		Average	32.6238		Average	48.1414
	mean			mean			mean			mean			mean			mean
1	64.2		1	197.866		1	201.387		1	35.061		1	195.843		1	197.72
2	60.542		2	203.174		2	204.692		2	196.036		2	189.94		2	196.521
3	204.21		3	191.414		3	201.641		3	190.01		3	185.204		3	189.95
4	197.878		4	223.329		4	223.301		4	185.136		4	215.842		4	44.342
5	191.293		5	179.902		5	203.427		5	215.855		5	177.232		5	218.52
6	51.929		6	64.667		6	75.583		6	177.544		6	29.5		6	178.71
7	223.315		7	61.778		7	101.389		7	26.842		7	28.84		7	45.895
8	179.258		8	92.046		8	74.438		8	27.294		8	245		8	52.536
9	47.647		9	63.603		9	245		9	33.222		9	30.462		9	40.279
10	68.388		10	59.385		10	74.839		10	31.524		10	30.333		10	47.859
11	46.231		11	64.365		11	68.778		11	27.321		11	30.19		11	40.973
12	59.693		12	61.619		12	78.605		12	25		12	30.444		12	41.278
13	245		13	245		13	72.95		13	31.411		13	29.676		13	39.529
14	48.071		14	58.25		14	68.424		14	28.474		14	29.345		14	245
15	45.5		15	71.591		15	66.857		15	34.403		15	26.222		15	41.545
16	47.227		16	68.49		16	80.689		16	28.462		16	31.47		16	44.043
17	82.443		17	58.583		17	67.731		17	245		17	28.079		17	43.649
18	54.326		18	61.831		18	69.382		18	32.313		18	29.627		18	56.151
19	56.864		19	58.429		19	63.714		19	26.4		19	31.632		19	41.824
20	76.34		20	76.686		20	70.199		20	28.143		20	31.34		20	49.337
21	55.344		21	65.217		21	73.226		21	28		21	37.196		21	41.6
22	66.946		22	55.444		22	62.188		22	29.071		22	29.927		22	45.118
23	56.556		23	72.5		23	71.238		23	28.191		23	29.878		23	40.9
24	79.194		24	66.837		24	63.429		24	29.143		24	28.738		24	41.263
25	48.05		25	62.659		25	67		25	30.109		25	30.752		25	43.222
26	57.182		26	74.414		26	85.418		26	29.628		26	27.083		26	44.992
27	50		27	56		27	66.083		27	32.76		27	50.587		27	48.978
28	63.152		28	58.5		28	64.769		28	33.606		28	26.767		28	43.48
29	48.222		29	66.983		29	70.684		29	31.38		29	28.475		29	39.3
30	46.692		30	65.429		30	74.722		30	28.367		30	30.417		30	75.971
31	70.654		31	60		31	65.438		31	26.8		31	27.87		31	41.833
32	55.8		32	61.622		32	65.333		32	25.925		32	30.486		32	44.429
33	66.732		33	60.784		33	76.717		33	29.583		33	29.73		33	48.042
34	51.389		34	79.034		34	85.438		34	27.111		34	29.733		34	46.526
35	46.185		35	54.3		35	79.643		35	25.938		35	26.636		35	42.273
36	66.552		36	64.889		36	71.429		36	31.032		36	26.364		36	48.579
37	57.853		37	60.625		37	69.061		37	29.13		37	27.714		37	55.476
38	58.875		38	67.692		38	69.65		38	28.916		38	26.833		38	52.59
39	45.722		39	58.435		39	76.061		39	31.754		39	29.494		39	40.92
40	69.389		40	60.942		40	81.431		40	29.28		40	27.808		40	41
41	54.692		41	60.571		41	64.351		41	31.474		41	28.529		41	42.212
42	58.552		42	58.622		42	62.571		42	27.556		42	29.786		42	47.951
43	57.944		43	57.095		43	67.225		43	31.636		43	27.964		43	45.769
44	56.822		44	83.531		44	64.591		44	27.6		44	27.2		44	44.235
45	54.906		45	56.167		45	90.541		45	26.857		45	38.583		45	38.923
46	53.167		46	55.091		46	113.078		46	26.652		46	32.803		46	52.839
47	53.333		47	65.263		47	68.196		47	27.267		47	39.742		47	53.753
48	61.083		48	59.667		48	64.091		48	26.963		48	27.644		48	40.133
49	56.242		49	63.517		49	85.704		49	29.629		49	28.312		49	44.877
50	54.784		50	111.525		50	79.196		50	25.818		50	27.281		50	51.111
51	52.641		51	70.455		51	76.333		51	28.143		51	29.429		51	42.379
52	55.276		52	80.833		52	70.519		52	32.165		52	28.071		52	46.829
53	55.963		53	72.945		53	73.524		53	25.818		53	27.4		53	52.608
54	51.304		54	56.667		54	80.614		54	34.333		54	32.449		54	43.462
55	48.2		55	62.407		55	74.567		55	26.357		55	32.5		55	42.875
56	50.195		56	58.467		56	72.63		56	27.694		56	27		56	39.833
57	48.37		57	68.326		57	70.667		57	27.875		57	32.568		57	52.824
58	50.133		58	76.17		58	76.698		58	28.333		58	30.43		58	43.25
59	64.28		59	72.492		59	79.392		59	28.581		59	31.312		59	41.308
60	62.327		60	66.38		60	83.319		60	31.039		60	32.585		60	43.542
61	46		61	63.987		61	63.471		61	31.693		61	26.5		61	45.588
62	54.04		62	71.5		62	70.944		62	27.053		62	30.071		62	39
63	45.8		63	67.03		63	72.153		63	38.221		63	29.118		63	40
64	98.538		64	73.267		64	68.139		64	28.306		64	27.4		64	45.938
65	56.125		65	75.113		65	80.996		65	29.557		65	27.714		65	39.2
66	51.243		66	55.083		66	67.854		66	34.948		66	33.355		66	41.125
67	57.241		67	54.4		67	72.136		67	33.556		67	26.6		67	42.519
68	71.092		68	72.4		68	63.438		68	28.375		68	30.902		68	42.125
69	53.864		69	61.63		69	72.91		69	26.8		69	29.514		69	51.601
70	48.31		70	61.214		70	92.243		70	25.333		70	27.118		70	40.417
71	49.55		71	68.576		71	66.6		71	26		71	41.568		71	53.589
72	51.3		72	56.381		72	67.152		72	33.721		72	26.2		72	41.391
73	53.222		73	68.769		73	68.227		73	27.133		73	29.538		73	45.5
74	49.4		74	57.462		74	77.198		74	27.782		74	39.044		74	53.446
75	48.4		75	83.382		75	72.636		75	34.43		75	33.638		75	41.263
76	57.091		76	75.975		76	67.358		76	28.169		76	31.76		76	48.643
77	48.909		77	57.061		77	79.103		77	27.2		77	30.765		77	67.617
78	47.111		78	59.647		78	81.25		78	27.24		78	31.13		78	44.533
79	48.647		79	56.069		79	61.897		79	28.591		79	34.5		79	39.333
80	55.5		80	55.391		80	83.166		80	26.848		80	29.5		80	58.392
81	59.041		81	62.318		81	62.3		81	35.289		81	26.438		81	49
82	59.944		82	71.5		82	64.385		82	28.412		82	30.758		82	42.633
83	46.32		83	65.34		83	70.912		83	33.07		83	27.286		83	49.959
84	47.929		84	56.333		84	85.195		84	30.378		84	35.181		84	38.667
85	54.647		85	57.944		85	63.103		85	36.283		85	34.843		85	43.158
86	53.162		86	57.938		86	70.291		86	30.2		86	26.333		86	55.579
87	47.222		87	62.576		87	68.385		87	30.455		87	30.097		87	40.222
88	68.899		88	60.444		88	84.861		88	32.871		88	30.316		88	40.412
89	59.81		89	73.922		89	91.783		89	42.254		89	34.656		89	50.142
90	48.143		90	61.129		90	67		90	32.724		90	40.333		90	46.962
91	58.894		91	56.474		91	94.565		91	29.889		91	36.242		91	43.375
92	47.812		92	59.059		92	63.188		92	29.095		92	29.048		92	39.667
93	51.292		93	56		93	71.733		93	28.75		93	26.812		93	57.687
94	49.333		94	69.242		94	67.462		94	34.865		94	32.828		94	44.909
95	57.765		95	62.044		95	78.463		95	28.737		95	27.606		95	46.714
96	52.091		96	62.726		96	84.912		96	37.013		96	29.6		96	41.857
97	52.258		97	68.477		97	79.919		97	29		97	26.714		97	46.25
98	52.143		98	78.34		98	62.4		98	29.611		98	27.125		98	42.214
99	57.719		99	60.833		99	77.833		99	29.931		99	31.548		99	48.658
100	53.257		100	54.652		100	66.895		100	26.907		100	34.015		100	47.965
101	46.429		101	75.309		101	85.754		101	30.371		101	32.169		101	44.905
102	49.48		102	60.729		102	63.2		102	26.917		102	30.368		102	47.503
103	48.5		103	58.975		103	101.076		103	25.875		103	29.328		103	55.763
104	50.464		104	59.185		104	72.344		104	26.476		104	36.354		104	50.44
105	56.511		105	59.389		105	69.074		105	26.706		105	27.667		105	40.077
106	56.261		106	59.92		106	81.539		106	30.593		106	26.909		106	39.963
107	48.786		107	63.397		107	74.21		107	29.407		107	29		107	56.419
108	55.806		108	60.524		108	72.645		108	31.76		108	31.845		108	40.2
109	50.923		109	69.581		109	68.965		109	30.818		109	27		109	66.45
110	55.765		110	62.844		110	67.546		110	31.142		110	28.833		110	41.273
111	54.333		111	70.653		111	63.083		111	27.6		111	43.58		111	43.576
112	63.556		112	66.966		112	63		112	26.56		112	28		112	46.037
113	55.333		113	57.41		113	65.294		113	28.19		113	27.682		113	43.691
114	53.103		114	69.151		114	64.333		114	36.878		114	26.182		114	39.5
115	59.152		115	60.085		115	71.111		115	30.271		115	31.301		115	42.833
116	51.091		116	58.444		116	78.152		116	29.957		116	26		116	39
117	58.714		117	72.872		117	70.152		117	26.667		117	35.291		117	43.938
118	47.857		118	62.833		118	70.394		118	30.372		118	29.815		118	43.847
119	51.306		119	58.458		119	80.512		119	35.829		119	28		119	45.328
120	61.331		120	83.671		120	70.877		120	28.47		120	28.229		120	53.2
121	49.4		121	62.778		121	66.733		121	26.455		121	34.091		121	47
122	49.435		122	64.175		122	81.67		122	26.158		122	27.933		122	44.7
123	50.167		123	55.667		123	61.636		123	30.629		123	27.654		123	39.5
124	47.366		124	65.317		124	94.579		124	29.846		124	29.396		124	46.327
125	55.4		125	70.804		125	70.227		125	25.963		125	35.857		125	46.273
126	54.516		126	56.655		126	67.259		126	26		126	31.429		126	45.375
127	53.905		127	59.083		127	64.929		127	28.143		127	26.545		127	40.9
128	46.167		128	61.225		128	65.077		128	28.806		128	29.615		128	55.963
129	49.611		129	56.455		129	72.725		129	29.595		129	28.958		129	53.978
130	51.651		130	64.643		130	69.893		130	26.091		130	29.333		130	46.396
131	55.519		131	57.929		131	70.704		131	28.053		131	26.364		131	50.136
132	56.576		132	78.391		132	71.727		132	29.297		132	29.654		132	43.043
133	54.638		133	63.171		133	76.5		133	26.8		133	27.2		133	42.296
134	58.75		134	57.864		134	79.753		134	55.648		134	28.5		134	44.504
135	50.632		135	64.69		135	84.813		135	29.424		135	27.724		135	45.692
136	48.214		136	73.375		136	80.642		136	32.25		136	29.412		136	41.318
137	62.842		137	55.364		137	65.5		137	32.643		137	27.28		137	53.202
138	50.047		138	64.815		138	71.169		138	26.5		138	26.333		138	42.13
139	45		139	62.538		139	61.8		139	31.105		139	28.143		139	41.75
140	58.349		140	59.339		140	83.063		140	28.6		140	28.263		140	45.256
141	59.025		141	60.611		141	75.5		141	33.413		141	26.333		141	46.406
142	54.915		142	71.211		142	67.97		142	26.944		142	30.771		142	50.113
143	70.198		143	74.157		143	79.146		143	28.067		143	26		143	47.792
144	51.269		144	73.409		144	65.611		144	29.625		144	30.486		144	41.667
145	49.25		145	57.909		145	66.484		145	28.759		145	31.797		145	41.722
146	47.357		146	59.913		146	78.12		146	26.929		146	27.333		146	45.619
147	52.184		147	56.933		147	75.538		147	30.45		147	30.586		147	55.235
148	47.733		148	62.457		148	85.367		148	26.273		148	26.583		148	42.814
149	46.364		149	71.355		149	63.571		149	26.333		149	33.423		149	40.7
150	50.4		150	58.107		150	74.321		150	28.833		150	28.562		150	44.64
151	67.238		151	68.73		151	69.409		151	27		151	28.913		151	51.559
152	66.592		152	64.58		152	69.149		152	29.2		152	28.636		152	41.8
153	59.35		153	61.842		153	70.562		153	26.273		153	27.8		153	58.518
154	47.944		154	55.2		154	69.781		154	27.25		154	31.241		154	42.111
155	46.214		155	71.309		155	81.057		155	30.211		155	28.062		155	67.587
156	58.029		156	60.529		156	70.08		156	26.312		156	26.8		156	40.5
157	51.5		157	60.467		157	78.467		157	28.722		157	29.7		157	46.562
158	53.269		158	68.08		158	67.407		158	28.944		158	29.556		158	39.471
159	46.364		159	68		159	73.099		159	32.797		159	27.059		159	42.5
160	57.477		160	60.667		160	78.69		160	26.683		160	29.017		160	39.714
161	61.237		161	58.619		161	78.978		161	27.188		161	29.588		161	43.55
162	55.309		162	59.429		162	75.051		162	29.077		162	38.27		162	52.98
163	55.023		163	61.333		163	64.562		163	29.303		163	26.5		163	41.6
164	62.585		164	57.188		164	80.099		164	26		164	30.286		164	45.286
165	47.381		165	62.027		165	62.25		165	32.149		165	30.879		165	42.4
166	47.167		166	56.917		166	65.692		166	26.867		166	26.286		166	52.442
167	51.312		167	58.042		167	94.298		167	33.13		167	26.474		167	49.566
168	56.933		168	58.667		168	67.944		168	32.565		168	36.249		168	38.917
169	57.66		169	60.8		169	79.821		169	29.226		169	30.278		169	52.393
170	68.557		170	57.059		170	75.031		170	29.048		170	26.842		170	47.451
171	86.074		171	57.643		171	71.933		171	27.8		171	27.444		171	41.923
172	51.444		172	54.643		172	63.4		172	26.556		172	28.188		172	41.333
173	65.087		173	56.692		173	102.392		173	33.5		173	41.738		173	45.464
174	62.637		174	67.182		174	111.714		174	28.048		174	29.526		174	38.882
175	52.625		175	59.636		175	65.619		175	26.357		175	39.554		175	40.733
176	62.2		176	63.27		176	72.167		176	30.936		176	28.627		176	39.2
177	55.316		177	62.094		177	74.906		177	29.053		177	31.733		177	47.571
178	49.308		178	55.074		178	67.944		178	27.286		178	28.2		178	43.296
179	48		179	74.547		179	76.443		179	29.333		179	26		179	53.975
180	47.294		180	59.143		180	76.571		180	29.385		180	26.364		180	44.634
181	53.971		181	70.576		181	64.878		181	27.565		181	40.832		181	40.095
182	55		182	73.038		182	65.85		182	27.68		182	28.895		182	46.092
183	47.846		183	57.729		183	73.5		183	35		183	45		183	68.671
184	52.5		184	63.771		184	72.815		184	30.75		184	29.603		184	52.074
185	49.679		185	60.825		185	65.488		185	29.429		185	31.426		185	56.095
186	49.571		186	60.5		186	65.708		186	26.214		186	28.152		186	41.864
187	50.143		187	64.929		187	66.791		187	38.478		187	27.926		187	53.22
188	62.077		188	56.882		188	88.539		188	46.383		188	42.872		188	56.929
189	47.611		189	60.316		189	65.5		189	35		189	37.416		189	41.385
190	57.807		190	55.909		190	78.85		190	30.95		190	28.958		190	43.011
191	52.571		191	55.615		191	62.667		191	26.167		191	26.364		191	42.438
192	49.462		192	67.846		192	63.733		192	31.231		192	30.44		192	40.077
193	47.182		193	65.731		193	84.05		193	26.947		193	28.96		193	40.188
194	49.524		194	63.059		194	68.889		194	31.162		194	28.333		194	64
195	54.077		195	65.199		195	81.129		195	31.365		195	29		195	40.15
196	48.389		196	69.278					196	29.955		196	32.051		196	51.601
197	54.2		197	62.067					197	28.167		197	33.535		197	40.526
198	45.538		198	58.231					198	27.6		198	37.416		198	41.296
199	52.891		199	68.527					199	34.674		199	35.224		199	44.645
200	56.493		200	63.235					200	32.997		200	26.867		200	49.836
201	62.871		201	66.655					201	29.031		201	26.611		201	55.25
202	44.333								202	31.795		202	31.75		202	42.2
203	51.125								203	27.045		203	33		203	45.6
204	53.96								204	26.952		204	44.125		204	48.633
205	50.213								205	32.391		205	30.042		205	42.969
206	59.016								206	28.316		206	28.818		206	40.5
207	49.717								207	29.646		207	27.261		207	48.323
208	62.478								208	28.611		208	30.785		208	49.693
209	52.797								209	28.14		209	33.667		209	39.231
210	48.389								210	27.056		210	34.118		210	42.765
211	49.545								211	29.411		211	30.493		211	62.352
212	46.429								212	27.858		212	31.462		212	43.343
213	63.171								213	25.636		213	29.6		213	46.158
214	53.304								214	26.042		214	29.25		214	51.421
215	54.625								215	25.727		215	26.6		215	55.27
216	47.846								216	29.5		216	31.567		216	46.767
217	59.429								217	26.458		217	27.8		217	39.923
218	59.614								218	26.462		218	30.98		218	41.523
219	55.176								219	33.802		219	26.615		219	46.606
220	48.273								220	29.347		220	42.648		220	51.918
221	67.287								221	26.733		221	29		221	43.611
222	55.336								222	28.809		222	27.2		222	42.591
223	52.889								223	28.412		223	28.089		223	46.615
224	55.312								224	31.109		224	28.769		224	43.667
225	59.976								225	31.639		225	31.56		225	42.708
226	47.4								226	33.294		226	26.955		226	50.909
227	52.032								227	27.286		227	28.343		227	43.892
228	46.083								228	31.635		228	28.045		228	49.424
229	47.821								229	34.069		229	28.308		229	44.321
230	65.501								230	33		230	29.565		230	52.429
231	47.833								231	26.12		231	27.278		231	42.333
232	53.125								232	30.678		232	26.429		232	46.75
233	65.24								233	30.856		233	41.496		233	45.15
234	57.679								234	29.698		234	27.515		234	59.936
235	48.417								235	26.2		235	29.273		235	59.986
236	51.991								236	30.441		236	32.69		236	57.882
237	62.027								237	29.333		237	30.468		237	49.775
238	54.333								238	27.96		238	26.533		238	38.941
239	56.325								239	26.455		239	31.829		239	56.637
240	46.8								240	25.7		240	29.294		240	45.9
241	50.945								241	33.129		241	26.167		241	44.9
242	57.481								242	30.605		242	31.102		242	38.533
243	55.808								243	30.621		243	27		243	44.4
244	58.569								244	32.311		244	27.826		244	42.846
245	53.85								245	38.548		245	27.688		245	56.92
246	75.848								246	27.633		246	28.8		246	46.135
247	48.769								247	27.833		247	27.723		247	54.425
248	68.198								248	29.85		248	28.621		248	51.593
249	54.829								249	41.69		249	27.273		249	39.55
250	60.5								250	27.385		250	28.828		250	49.921
251	54.725								251	32		251	26.6		251	45.95
252	57.26								252	28.577		252	30.038		252	50.495
253	52.843								253	28.78		253	33.154		253	40.214
254	67								254	27.136		254	28.846		254	47.75
255	53.895								255	27.258		255	29.174		255	41
256	51.8								256	30.247		256	41.443		256	59.72
257	51.786								257	26.364		257	26.8		257	40.769
258	58.825								258	28.625		258	27.75		258	53.208
259	58.256								259	28.25		259	30.562		259	43.934
260	59.778								260	26.091		260	35.642		260	52.673
261	56.361								261	32.214		261	27		261	46.838
262	53.375								262	25.667		262	44.627		262	39.667
263	45.75								263	36.594		263	31.045		263	48.31
264	53.845								264	26.235		264	27.857		264	40.364
265	56.826								265	26.207		265	27.333		265	52.068
266	51.857								266	33.472		266	27.864		266	44.952
267	49.512								267	29.964		267	29.194		267	38.364
268	53.049								268	28.208		268	29.5		268	42.833
269	56.5								269	32.556		269	33.024		269	46.863
270	49.083								270	27.16		270	28.385		270	39.385
271	59.9								271	29.132		271	26.619		271	51.451
272	53.8								272	28.758		272	31.86		272	42.794
273	46.917								273	30.314		273	29.706		273	47.58
274	46.333								274	28.438		274	26.625		274	39.938
275	63.469								275	29.971		275	27.227		275	46.302
276	46.941								276	32.053		276	33.627		276	45.179
277	58.734								277	26.548		277	34.52		277	41.48
278	44.364								278	27.925		278	28.034		278	55.122
279	55.704								279	26.053		279	27.867		279	40.231
280	59.177								280	31.316		280	33.681		280	46.31
281	52.824								281	27.867		281	30.358		281	49.82
282	60.627								282	28.059		282	30.119		282	45.854
283	47.5								283	34.681		283	30.333		283	42
284	61.742								284	26.983		284	27.25		284	43.6
285	49.577								285	27.146		285	28.235		285	51.415
286	45.955								286	33.818		286	34.147		286	55.121
287	52.936								287	28.2		287	33.309		287	55.771
288	58.471								288	28		288	30.936		288	45.18
289	87.084								289	27.655		289	27.455		289	40.611
290	54.268								290	27.556		290	27.267		290	55.708
291	45.947								291	26.647		291	27.375		291	56.341
292	58.915								292	27.52		292	32.393		292	42.526
293	53.105								293	27.8		293	31.92		293	39
294	58								294	30.903		294	36.844		294	44.348
295	53.947								295	28.514		295	29.235		295	46.889
296	47.364								296	27.5		296	37.816		296	45
297	51.72								297	27.9		297	37.329		297	49.988
298	61.198								298	26.909		298	38.226		298	43.857
299	49.065								299	27.053		299	37.83		299	41.5
300	60.957								300	26.857		300	30.834		300	50.097
301	68.609								301	30.318		301	28.308		301	40.545
302	53.121								302	29.045		302	28.636		302	42.5
303	44.8								303	27.125		303	27.485		303	41.4
304	59.314								304	27.759		304	27.053		304	47.386
305	50.318								305	26.185		305	30.688		305	41.154
306	55.069								306	27.727		306	28.357		306	39.867
307	47.542								307	27.826		307	27.429		307	40.667
308	54.25								308	30.933		308	27.357		308	39.5
309	51.326								309	27.857		309	31.087		309	54.318
310	60.167								310	26.143		310	29.222		310	56.9
311	57								311	30.7		311	35.19		311	39.643
312	54.48								312	29.726		312	32.928		312	40.741
313	50.658								313	26.686		313	26.545		313	39.118
314	46.05								314	29.9		314	26.227		314	45.435
315	52.471								315	29.018		315	32.75		315	41.214
316	53.389								316	29.962		316	34.489		316	47.875
317	61.043								317	32.848		317	28.056		317	48.157
318	46.5								318	35.276		318	28.607		318	40.909
319	56.758								319	31.76		319	30.342		319	38.571
320	54.434								320	28.067		320	29.092		320	45.194
321	56.638								321	28.368		321	26.364		321	73.617
322	65.452								322	28.525		322	30.15		322	41.3
323	46.923								323	34.877		323	27.931		323	43.904
324	72.5								324	26.2		324	30.68		324	41.273
325	59								325	28.5		325	27.048		325	42.812
326	56.15								326	28.143		326	36.888		326	43.549
327	53.389								327	29.667		327	26.821		327	39.923
328	55.361								328	32.847		328	32.92		328	41.789
329	51.125								329	27		329	30.27		329	43.75
330	57.4								330	33.679		330	30.4		330	40.5
331	50.571								331	27.565		331	31.675		331	44.919
332	46.154								332	26.167		332	31.471		332	45.149
333	64.3								333	27.75		333	27.632		333	48.7
334	49.389								334	28.8		334	26.158		334	41.977
335	55.471								335	27.786		335	31.88		335	39.583
336	55.235								336	27.108		336	28.625		336	65.382
337	61.673								337	32.781		337	30		337	43.158
338	49								338	28.395		338	28.4		338	56.481
339	51.889								339	33.296		339	26.682		339	39.438
340	50.562								340	34.136		340	28.583		340	42.607
341	60.158								341	38.345		341	29.042		341	81.759
342	50.589								342	30.638		342	27.094		342	39.286
343	56.355								343	29.128		343	31.393		343	48.097
344	75.312								344	26.5		344	36.242		344	45.206
345	58.833								345	32.85		345	30.4		345	45.889
346	58.667								346	27.421		346	32.704		346	53.4
347	60.865								347	27.235		347	37.122		347	41.9
348	67.068								348	29.114		348	28.82		348	44.407
349	55.638											349	28.175		349	48.889
350	46.467											350	28.125		350	41.333
351	55.34											351	28.074		351	43.438
352	61.236											352	35.549		352	40.667
353	61											353	27.118		353	48
354	60.135											354	29.87		354	51.361
355	50.154											355	28.176		355	53.537
356	44.8											356	33.067		356	46.833
357	54											357	39.833		357	42.204
358	50.909											358	28.1		358	47.724
359	50.059											359	27.846		359	43.429
360	45.818											360	28.862		360	43.647
361	48.185											361	32.188		361	39.429
362	53.907											362	26.4		362	42.714
363	57.333											363	27.211		363	49.337
364	56.705											364	29.25		364	40.364
365	58.571											365	55.012		365	40.231
366	52.315											366	32.932		366	44
367	48.417											367	28.769		367	47.858
368	47.625											368	29.611		368	42.6
369	48.8											369	26.308		369	43.108
370	48.909											370	38.826		370	58.66
371	62.25											371	28.4		371	45.585
372	52.682											372	32.923		372	45.467
373	73.927											373	39.4		373	52.242
374	61.37											374	32.151		374	39.867
375	48.923											375	28.057		375	42.318
376	49.784											376	27.833		376	41
377	50.31											377	29		377	42.125
378	45.812											378	28.632		378	46.412
379	56.364											379	28.238		379	44.615
380	49											380	32.895		380	43.5
381	52.312											381	31.758		381	51.038
382	57.483											382	26.833		382	39.933
383	50.067											383	28.304		383	52.215
384	61.406											384	30.619		384	56.781
385	61.238											385	28.588		385	42.613
386	78.259											386	27.067		386	48.444
387	52.429											387	26		387	44.042
388	66.422											388	27		388	50.2
389	49.8											389	40.636		389	40.706
390	62.778											390	26.6		390	42.084
391	52.75											391	31.5		391	43.037
392	71.929											392	26.182		392	42.786
393	52.667											393	30.233		393	48.256
394	51.253											394	29.893		394	45.397
395	49.69											395	33.241		395	41.636
396	47.583											396	30		396	44.5
397	56.857											397	27.429		397	41.444
398	45.923											398	27.688		398	41.5
399	62.939											399	36.147		399	51.488
400	57.495											400	26.692		400	42.52
401	51.085											401	35.237		401	42.952
402	57.429											402	27.183		402	40.636
403	52.639											403	28.659		403	42.4
404	74.242											404	26.769		404	49.899
405	47.214											405	32.49		405	48.711
406	61.681											406	30.73		406	40.091
407	46.786											407	33.266		407	49.522
408	49.779											408	34.2		408	53.008
409	48.2											409	27.357		409	42.333
410	52.261											410	26.2		410	51.167
411	51.481											411	27.857		411	51.286
412	49											412	33.717		412	48.286
413	58.648											413	29.321		413	43.522
414	52.837											414	32.5		414	50.014
415	44.6											415	30.679		415	46.371
416	51.526											416	29.443		416	43.355
417	53.123											417	30.843		417	57.415
418	66.527											418	26.786		418	43.694
419	47											419	26.692		419	43.757
420	60.75											420	28.824		420	58.191
421	48											421	32.828		421	42.2
422	51.957											422	31.734		422	46.938
423	45.588											423	30.639		423	47.308
424	49.062											424	38.426		424	45.045
425	46.636											425	26.6		425	54.429
426	48.943											426	28.615		426	42.606
427	61.481											427	34.381		427	52.566
428	48.8											428	28.056		428	49.281
429	56.944											429	34.571		429	45.348
430	56.423											430	29.899		430	53.76
												431	29.099		431	38.5
												432	28.649		432	41.333
												433	29.271		433	39.714
												434	30.05		434	39.714
												435	27.85		435	38.87
												436	30.433		436	40.556
												437	36.09		437	39.667
												438	27.2		438	50.378
												439	27.273		439	46.697
												440	30.882		440	47.297
												441	32.184		441	46.655
												442	28.174		442	39.362
												443	26.429		443	44.826
												444	27.385		444	53.172
												445	28.863		445	47.718
												446	31.411		446	47.974
												447	38.55		447	43.368
												448	33.662		448	39.6
												449	27.636		449	51.541
												450	26.75		450	47.458
															451	49.053
															452	40.1
															453	45.379
															454	44.543
															455	62.866
															456	41.111
															457	40.2
															458	40.905
															459	53
															460	40.85
															461	43.148
															462	41.615

## Sheet: Fig.1F_IMS(GDP)
Ctrl1			Ctrl2			Ctrl3			MMF1			MMF2			MMF3
Average	63.4083		Average	55.8646		Average	34.6221		Average	27.1009		Average	21.0923		Average	22.9528
	mean			mean			mean			mean			mean			mean
1	122.303		1	197.707		1	195.94		1	21.867		1	14.833		1	28.25
2	58.071		2	196.438		2	190.02		2	19		2	14.3		2	26.16
3	87.479		3	189.89		3	180.689		3	19		3	16.536		3	76.284
4	204.548		4	220.892		4	29.355		4	35.042		4	16.808		4	19.6
5	197.988		5	179.395		5	215.868		5	22.037		5	18.895		5	42.156
6	190.3		6	59.459		6	177.28		6	17.667		6	14.786		6	22.646
7	223.507		7	68.89		7	25.944		7	31.085		7	14.5		7	193.69
8	181.855		8	70.667		8	25.917		8	193.655		8	14.56		8	189.99
9	82.398		9	51.6		9	25.182		9	188.693		9	18.514		9	180.802
10	60.205		10	82.951		10	38.654		10	180.528		10	18		10	24.438
11	87.931		11	59.81		11	43.188		11	215.816		11	18.692		11	19.926
12	52.154		12	245		12	30.275		12	176.071		12	13.333		12	170.357
13	108.514		13	65.765		13	24.182		13	21.375		13	19.8		13	27.845
14	150.606		14	42.636		14	25.167		14	19.393		14	16.25		14	21.97
15	61.932		15	53.5		15	245		15	28.397		15	21.735		15	24.295
16	245		16	40.5		16	34.781		16	22.158		16	193.655		16	22.488
17	51.25		17	65.381		17	27.043		17	24.41		17	189.94		17	22.038
18	134.211		18	40.154		18	31.234		18	20.768		18	180.557		18	16.792
19	47.261		19	56.512		19	26.25		19	245		19	17.421		19	27.029
20	54.278		20	56.484		20	35.122		20	20.222		20	15.833		20	245
21	62.778		21	42.846		21	27.238		21	22.821		21	215.789		21	16.917
22	49.833		22	43.385		22	27.254		22	35.786		22	175.976		22	19.139
23	52.667		23	41.84		23	27.15		23	25.333		23	15		23	16.727
24	59.08		24	62.562		24	26.595		24	19.167		24	15.125		24	25.419
25	48.5		25	53.667		25	47.274		25	22.562		25	16.5		25	20.147
26	82.345		26	40.636		26	33.343		26	20.867		26	27.021		26	16.5
27	54.278		27	43.963		27	28.541		27	21.444		27	17.22		27	21.085
28	59.333		28	56.171		28	23.667		28	19.2		28	20.43		28	20.944
29	77.77		29	56.1		29	31.744		29	22.172		29	17.652		29	21.67
30	46		30	66.4		30	24.789		30	20.875		30	16.438		30	15.6
31	61.607		31	49.516		31	25.071		31	21.526		31	18.391		31	22.2
32	62.361		32	49.267		32	26.765		32	23.643		32	17.938		32	21.036
33	46.474		33	43.455		33	28.235		33	21.053		33	16.302		33	26.712
34	65.323		34	48.514		34	36.326		34	25.3		34	14.867		34	23.18
35	48.783		35	66.5		35	30.377		35	23.5		35	13.696		35	21.5
36	50.929		36	47		36	39.727		36	19		36	24.738		36	17.588
37	65.826		37	44.175		37	23.769		37	19.833		37	20.417		37	27.333
38	82.867		38	44.222		38	27.292		38	21		38	245		38	17.438
39	69.79		39	49.6		39	26.207		39	22.389		39	16.913		39	19.903
40	60.163		40	43.6		40	23.944		40	26.109		40	15.829		40	15.455
41	63.764		41	56.778		41	26		41	19.214		41	31.656		41	16.3
42	50.222		42	63.491		42	27.92		42	19		42	14.844		42	17.688
43	52.643		43	53.405		43	39		43	22.702		43	14		43	33.312
44	66.759		44	78.49		44	27.611		44	19.652		44	17.062		44	20.981
45	62.889		45	40.182		45	24.471		45	28.867		45	20.412		45	21.037
46	52.118		46	43.654		46	32.401		46	19		46	15.412		46	18.217
47	49.417		47	53.052		47	29.737		47	20.302		47	22.092		47	17.154
48	83.037		48	52.632		48	38.825		48	27.091		48	20.887		48	19.8
49	68.063		49	41.4		49	32.35		49	28.642		49	15.267		49	19.494
50	65.648		50	43.421		50	35.589		50	34.698		50	17.25		50	19.724
51	53.75		51	56.435		51	28.657		51	25.841		51	25.265		51	40.38
52	52.472		52	61.739		52	28.263		52	25.716		52	19.862		52	15.909
53	57.326		53	52.902		53	31.746		53	34.386		53	19.103		53	16.375
54	52.95		54	46.692		54	27.937		54	30.737		54	17.107		54	28.587
55	46.6		55	43.5		55	34.609		55	20.953		55	14.571		55	24.75
56	55.294		56	59.689		56	30.313		56	19.357		56	15.704		56	21.129
57	67.556		57	59.01		57	27.479		57	31.651		57	19.924		57	30.174
58	53.188		58	41.154		58	36.927		58	19.5		58	14.529		58	32.707
59	49.188		59	59.129		59	24.077		59	25.895		59	14.375		59	15.706
60	49.167		60	48.163		60	36.444		60	33.275		60	21.663		60	17.929
61	63.293		61	51.938		61	26.214		61	26.121		61	20.404		61	15.733
62	69.667		62	40.529		62	25.6		62	18.2		62	14.143		62	25.588
63	55.604		63	49		63	28.327		63	36.224		63	15		63	18.743
64	57.96		64	59.2		64	32.266		64	29		64	16.079		64	31.972
65	48.611		65	65.222		65	26.067		65	22.27		65	14.714		65	17.704
66	63.524		66	59.194		66	28.625		66	22.661		66	17.615		66	19.434
67	49.6		67	58.543		67	30.825		67	20.438		67	23.558		67	16.429
68	60.088		68	41.846		68	27		68	20.493		68	17.132		68	18.951
69	49.154		69	48.667		69	30.386		69	23.409		69	17.696		69	20.342
70	61.659		70	53.287		70	29.418		70	23.299		70	14.615		70	23.674
71	61		71	59.302		71	41.521		71	21.725		71	15.333		71	16.25
72	61.647		72	41.4		72	24.172		72	17.333		72	18.062		72	23.763
73	52.242		73	60.804		73	32.525		73	24.13		73	16.648		73	17
74	95.859		74	67.607		74	28.755		74	26.811		74	16		74	17.882
75	56.806		75	42.667		75	34.1		75	29.787		75	21.365		75	27.558
76	60.19		76	87.249		76	30.943		76	23.496		76	17.808		76	19.704
77	57.611		77	46.375		77	23.8		77	19.4		77	14.667		77	17.083
78	57.105		78	45.489		78	25.857		78	24.546		78	14.462		78	19.022
79	60.813		79	49.364		79	32.168		79	18.333		79	14.267		79	18.812
80	55.754		80	43.462		80	29.818		80	25.087		80	15.588		80	23.968
81	67.649		81	47.471		81	38.337		81	17.857		81	18.137		81	21.247
82	58.104		82	44.333		82	24.615		82	23.188		82	26.564		82	17.8
83	61.594		83	66.688		83	24.706		83	25.659		83	17.736		83	16.111
84	93.214		84	53.793		84	40.123		84	28.893		84	14.308		84	26.946
85	71		85	40		85	27.464		85	25.39		85	14.214		85	27.359
86	54.18		86	58.65		86	27.571		86	22.053		86	20.562		86	22.088
87	53.692		87	54.821		87	27.456		87	28.989		87	22.678		87	16.545
88	72.285		88	39.469		88	27.48		88	23.73		88	21.403		88	22.364
89	60.785		89	52.462		89	26.167		89	27.21		89	14.318		89	25.238
90	47.833		90	62.643		90	26		90	26.969		90	15.452		90	16.889
91	69.609		91	85.549		91	35.205		91	26.044		91	18.013		91	26.481
92	53.176		92	53.78		92	34.706		92	19.231		92	17.778		92	17.48
93	59.816		93	61.728		93	24.545		93	23.807		93	27.377		93	23.406
94	69.214		94	47.892		94	29.94		94	22.492		94	14.733		94	19.727
95	57.452		95	42.818		95	33.643		95	22.697		95	19.034		95	17.58
96	74.368		96	66.338		96	26.353		96	19.425		96	14.056		96	17.13
97	73.472		97	67.024		97	32.25		97	23.374		97	14.88		97	24.688
98	68.199		98	61.588		98	29.813		98	22.054		98	14.688		98	19.371
99	56.5		99	42.562		99	26.111		99	17.857		99	15		99	17.452
100	76.216		100	52.055		100	25.308		100	27.038		100	18.32		100	20.95
101	54.167		101	44.8		101	35.495		101	26.263		101	17.542		101	20.653
102	61.235		102	52.887		102	27.636		102	23.214		102	13.769		102	17.278
103	59.735		103	49.789		103	35.119		103	21.519		103	33.472		103	21.478
104	55.22		104	57.944		104	33.959		104	19.429		104	20.844		104	19.913
105	52.387		105	40.909		105	42.444		105	18.727		105	18.424		105	21.969
106	55.767		106	51.803		106	31.217		106	22.32		106	19		106	18.145
107	64.086		107	38.3		107	35.436		107	19.857		107	14.25		107	20.808
108	61.717		108	56.787		108	45.094		108	22.25		108	18.283		108	24.088
109	59.412		109	41.733		109	28.69		109	18.8		109	15.071		109	24.941
110	49.722		110	56.421		110	30.338		110	18.846		110	15.125		110	22.36
111	59.74		111	60.595		111	26.295		111	20.111		111	28.229		111	24.095
112	47.12		112	49.876		112	44.944		112	18.84		112	24.357		112	21
113	54.706		113	46.324		113	29.125		113	24.919		113	22.923		113	21.738
114	46.857		114	59.32		114	30.738		114	24.074		114	17.623		114	18.188
115	62.941		115	44.4		115	33.121		115	20.394		115	20.25		115	23.718
116	52.091		116	72.446		116	25.333		116	28.289		116	16.139		116	21.294
117	63.977		117	71.186		117	32.39		117	23.443		117	17.122		117	29.703
118	93.313		118	43.467		118	25.905		118	26.22		118	18.145		118	16.842
119	62.276		119	43.438		119	30.197		119	25.939		119	19.526		119	25.482
120	59.35		120	51.655		120	26.6		120	24.81		120	18		120	19.654
121	54.569		121	43.173		121	31.36		121	17.867		121	15.353		121	17.3
122	89.77		122	51.45		122	25.75		122	20.289		122	14.533		122	18.955
123	63.473		123	62.587		123	37.484		123	18.846		123	18.75		123	16.938
124	63.368		124	42.463		124	24.4		124	19.688		124	19.466		124	21.542
125	53.286		125	58.023		125	24.167		125	18.2		125	19.84		125	16.25
126	54.308		126	42.182		126	42.103		126	21.818		126	13.667		126	17.833
127	49.418		127	49.576		127	28.551		127	25.37		127	15.824		127	16.5
128	48.723		128	44.875		128	32.534		128	29.161		128	17.162		128	17.067
129	54.154		129	48.833		129	35.525		129	23.1		129	14.417		129	20.24
130	81.582		130	60.962		130	35.373		130	21.312		130	15.738		130	23.24
131	51.706		131	46.269		131	25.808		131	22.875		131	17.45		131	22.519
132	51.867		132	46.118		132	24.308		132	19		132	15.676		132	18.526
133	61.245		133	64.848		133	33.256		133	21.212		133	18.812		133	23.283
134	49.417		134	54.438		134	27.955		134	19.903		134	20.369		134	18.381
135	56.132		135	62.846		135	42.194		135	17.3		135	19.773		135	18.909
136	55.829		136	49.581		136	37.058		136	24.779		136	28.338		136	18.75
137	59.127		137	47.509		137	26.966		137	18.842		137	14		137	18.818
138	50.25		138	50.39		138	34.553		138	23.896		138	20.512		138	25.739
139	60.256		139	47.767		139	25.835		139	21.054		139	14.897		139	20.69
140	49.95		140	41.125		140	31.537		140	26.613		140	22.033		140	26.955
141	66.682		141	53.146		141	25.118		141	19.209		141	24.812		141	20.938
142	52.864		142	43.312		142	43.297		142	30.298		142	17.179		142	16
143	72.549		143	40		143	24.471		143	23.824		143	14		143	18.13
144	75.494		144	44.214		144	24.333		144	22.373		144	14.786		144	20.087
145	52.87		145	39.5		145	33.528		145	23.056		145	22.722		145	20.208
146	74.362		146	40.312		146	30.136		146	29.602		146	13.818		146	17.571
147	52.03		147	57.861		147	31.25		147	24.355		147	26.096		147	17.524
148	49.184		148	45.119		148	25.3		148	21.235		148	20.735		148	17.143
149	76.399		149	56.506		149	30.734		149	25.778		149	17.357		149	16.789
150	68.176		150	51.402		150	24.083		150	18.474		150	17.349		150	17.863
151	65.379		151	48.703		151	28.4		151	26.257		151	16.468		151	22.839
152	49.885		152	51.982		152	27.706		152	18.222		152	24.523		152	25.663
153	51.038		153	46.986		153	31.423		153	23.44		153	20.97		153	23.847
154	80.333		154	78.182		154	25.13		154	37.143		154	16.158		154	16.536
155	65.917		155	42.154		155	30.216		155	20.941		155	17.208		155	22.752
156	48.222		156	42.692		156	29.12		156	26.234		156	20.294		156	29.807
157	66.61		157	63.416		157	26.824		157	23.05		157	17.079		157	21.567
158	59.409		158	53.603		158	24.806		158	18.143		158	20.991		158	30.452
159	49.857		159	56.9		159	26.755		159	23.359		159	21.467		159	16.9
160	47.364		160	49.125		160	35.103		160	20.238		160	22.27		160	31.74
161	67.5		161	64.483		161	24.105		161	29.894		161	17.474		161	24.74
162	44.273		162	52.59		162	29.087		162	19.212		162	21.306		162	26.095
163	51.938		163	44.583		163	30.676		163	32.455		163	22.514		163	17.038
164	54.82		164	39.684		164	30		164	19.308		164	16.125		164	22.317
165	48.071		165	42.964		165	30.074		165	18		165	22.386		165	17.5
166	53.25		166	61.908		166	26.688		166	24.3		166	23.52		166	16.471
167	61.107		167	43.444		167	35.959		167	20.396		167	20.116		167	19.762
168	53.583		168	41.941		168	29.034		168	25.649		168	15.025		168	24.414
169	58.68		169	50.4		169	32.3		169	18.091		169	15.919		169	23.541
170	67.084		170	57.633		170	34.674		170	26.332		170	19.137		170	20.899
171	48.552		171	46.37		171	24.308		171	24.011		171	19.898		171	24.134
172	59.795		172	39.909		172	30.724		172	20.282		172	14.333		172	19.3
173	47.903		173	50.737		173	25.542		173	30.969		173	17.419		173	15.2
174	53.632		174	44.526		174	27.267		174	26.168		174	28		174	19.125
175	57.258		175	57.333		175	34.725		175	18.45		175	15.533		175	19.705
176	54.967		176	62.097		176	35.961		176	29.776		176	17.17		176	17.429
177	66.476		177	41.25		177	30.73		177	24.912		177	17.49		177	19.043
178	58.127		178	55.945		178	25.5		178	23.462		178	25.208		178	17.4
179	86.931		179	55.366		179	24		179	21.192		179	18.265		179	27.194
180	49.521		180	49.571		180	24.75		180	23.562		180	15.98		180	20.816
181	76.173		181	54.69		181	27.588		181	32.368		181	20.893		181	23.962
182	44.333		182	42		182	25.25		182	25.56		182	24.11		182	25.594
183	48.083		183	47.181		183	26.043		183	22.136		183	17.25		183	21.095
184	58.5		184	47.562		184	42.433		184	28.069		184	19.659		184	16.647
185	57.235		185	46.409		185	27.483		185	25.926		185	18.317		185	27.264
186	48.529		186	55.221		186	29.786		186	20		186	13.727		186	16.133
187	49.8		187	53.963		187	25.333		187	18		187	18.111		187	22.278
188	47.818		188	58.356		188	31.194		188	21.433		188	22.1		188	16.3
189	65.022		189	40.222		189	24.722		189	20.389		189	16.607		189	18.238
190	48.885		190	51.462		190	32.163		190	22.852		190	19.06		190	19.536
191	73.483		191	46		191	30.625		191	25.526		191	15.062		191	15.857
192	56.561		192	47.368		192	30.689		192	18.074		192	14.682		192	23.143
193	57.303		193	42.167		193	24.357		193	32.842		193	42.762		193	20.75
194	50.615		194	59.024		194	24.333		194	24.75		194	26.565		194	26.238
195	60.898		195	43.571		195	52.85		195	25.795		195	24.491		195	24.559
196	53.062		196	53.111		196	30.205		196	19.4		196	13.6		196	20.667
197	48.25		197	59.343		197	23.636		197	19.769		197	20.376		197	23.944
198	49.296		198	52.682		198	25		198	22.241		198	16.632		198	16.714
199	48.389		199	44.105		199	30.675		199	25.28		199	15.643		199	24.356
200	52.66		200	43.295		200	34.726		200	19.056		200	29.099		200	21.435
201	63.237		201	45.447		201	34.813		201	34.154		201	23.888		201	15.077
202	66.325		202	53.646		202	47.969		202	20.733		202	21.289		202	18.872
203	62.224		203	44.75		203	26.878		203	20.357		203	20.052		203	20.159
204	73.223		204	48.265		204	39.908		204	20.235		204	17.294		204	17.75
205	67.748		205	57.208		205	39.451		205	21.654		205	16.339		205	29.826
206	48.778		206	49.25		206	25.923		206	24.573		206	17.385		206	23.405
207	58.375		207	51.912		207	28.696		207	23.933		207	19.899		207	19.21
208	50.143		208	42.714		208	25.818		208	23.6		208	26.584		208	16.385
209	59.692		209	51.048		209	31.115		209	23.04		209	20.637		209	22.957
210	48.846		210	46.346		210	26.5		210	18.2		210	19.419		210	21.988
211	71.16		211	45.073		211	38.796		211	19.808		211	26.188		211	15.4
212	47.9		212	42.458		212	38.98		212	20.739		212	25.927		212	28.612
213	69.193		213	46.04		213	51.344		213	18.846		213	14.667		213	22.063
214	70.174		214	51.944		214	26.261		214	20.742		214	20.764		214	21.773
215	70.982		215	40.385		215	30		215	19.812		215	19.527		215	20.02
216	46.083		216	59.459		216	24.286		216	23.342		216	16.744		216	17.76
217	71.356		217	54.8		217	35.645		217	20.028		217	21.097		217	22.744
218	54.075		218	42.846		218	26.347		218	22.338		218	21.909		218	16.692
219	47.182		219	43.1		219	35.573		219	26.93		219	15.333		219	22.877
220	60.788		220	64.074		220	26.988		220	23.875		220	19.5		220	21.358
221	57.012					221	28.16		221	20.034		221	17.121		221	17.677
222	64.36					222	35.954		222	25.911		222	16.119		222	18.532
223	51.367					223	30.05		223	18.65		223	16.714		223	16
224	54.389					224	25.579		224	27.086		224	17.643		224	22.296
225	64.903					225	24.077		225	24.079		225	13.667		225	25.61
226	75.163					226	28.95		226	24.246		226	19.257		226	18.125
227	75.266					227	30.348		227	21.865		227	24.667		227	18.095
228	50.938					228	32		228	23.301		228	18.159		228	17.958
229	58.55					229	31.613		229	21.875		229	21.571		229	21.785
230	56.577					230	26.154		230	19.154		230	14.444		230	22.359
231	62.532					231	25.75		231	22.524		231	15.714		231	21.818
232	51.533					232	38.871		232	23.889		232	15.8		232	20.02
233	80.26					233	25.385		233	27.705		233	20.206		233	16.571
234	58.941					234	25.125		234	21.969		234	15.188		234	15.793
235	52.333					235	28.852		235	23.25		235	14.312		235	22.819
236	47.524					236	35.154		236	20.812		236	18.344		236	27.15
237	47.8					237	32.429		237	24		237	16.789		237	19.362
238	60.037					238	27.6		238	18.231		238	19.552		238	28.588
239	59.955					239	32.684		239	19.786		239	15.045		239	21.929
240	57.9								240	17.688		240	19.261		240	24.083
241	46.81								241	21.033		241	15.231		241	16.469
242	50								242	18.3		242	17.048		242	23.258
243	52.889								243	28.418		243	21.146		243	15.833
244	58.492								244	19.871		244	16.229		244	16.364
245	67.58								245	21.837		245	16.183		245	23.902
246	87.158								246	21.789		246	15.25		246	19.553
247	49.238								247	25.643		247	15.412		247	16.333
248	66.38								248	19.706		248	23.909		248	27.09
249	47.6								249	19		249	24.811		249	17.727
250	50.6								250	31.411		250	22.373		250	20.625
251	72.586								251	39.68		251	16.543		251	18.708
252	59.556								252	22.667		252	24.697		252	21.861
253	54.101								253	27.933		253	15.481		253	18.675
254	55.773								254	23.224		254	39.357		254	15.6
255	69.462								255	22.286		255	13.786		255	29.301
256	77.65								256	26.873		256	26.55		256	24.283
257	47.769								257	27.828		257	19.366		257	18.693
258	66.379								258	25.283		258	25.412		258	16.5
259	46.875								259	17.824		259	14.615		259	22.745
260	78.661								260	19.231		260	18.7		260	18.271
261	84.786								261	19.091		261	17.281		261	20.093
262	74.339								262	24.328		262	27.017		262	24.6
263	49.758								263	22.656		263	23.362		263	21.516
264	59.623								264	27.1		264	18.935		264	18.7
265	56.235								265	23.364		265	19.868		265	17.357
266	74.305								266	19		266	32.83		266	15.5
267	64.692								267	18.5		267	28.917		267	20.65
268	47.842								268	20.333		268	30.662		268	22.081
269	60.914								269	27.677		269	16.417		269	15.684
270	80.577								270	21		270	23.917		270	19.6
271	65.489								271	19		271	18.571		271	21.29
272	76.034											272	15.682		272	16.833
273	51.929											273	14.667		273	18.242
274	53.736											274	19.714		274	25.767
275	49.786											275	13.783		275	19.625
276	54.389											276	20.2		276	21.995
277	46.571											277	19.279		277	16.056
278	56.049											278	14.5		278	24.89
279	48.364											279	14.692		279	25.85
280	74.78											280	16.033		280	26.077
281	54.265											281	17.062		281	16.389
282	58.368											282	23.547		282	21.182
283	51.042											283	19.657		283	16.923
284	59.78											284	17.316		284	20.037
285	66.108											285	19.406		285	24.075
286	59.788											286	16.542		286	21.088
287	70.391											287	18.826		287	21.735
288	61.9											288	14.5		288	19.973
289	51											289	17.053		289	26.385
290	51											290	21.104		290	15.55
291	45.8											291	18		291	21.341
292	54.278											292	15.667		292	22.152
293	58.727											293	16.467		293	21.546
294	58.278											294	24.111		294	15.667
295	63.444											295	16.312		295	19.785
296	59.151											296	21.605		296	15.4
297	47											297	22.938		297	19.057
298	86.536											298	23.178		298	18.783
299	55.707											299	18.861		299	16.148
300	53											300	21.417		300	23.627
301	57.895											301	20.043		301	22.25
302	49.846											302	20.222		302	17.941
303	114.62											303	20.865		303	17
304	59.262											304	16.029		304	22.959
305	67.606											305	14.571		305	16.571
306	62.176											306	21.069		306	18.969
307	52.556											307	19.172		307	18.25
308	47.864											308	13.4		308	26.911
309	52.258											309	19.276		309	23.614
310	68.058											310	18.75		310	19.667
311	51.375											311	23.174		311	21.816
312	63.553											312	14.875		312	17.682
313	64.861											313	15.722		313	22.792
314	52.24											314	23.516		314	21.583
315	74.152											315	16.692		315	20.1
316	58.182											316	18.949		316	55.261
317	48											317	14.5		317	18.962
318	58.029											318	18.583		318	16.562
319	56											319	32.353		319	33.011
320	47											320	19		320	23.033
321	65.555											321	20.977		321	16.615
322	60.37											322	16.271		322	19.083
323	44.167											323	13.357		323	19.48
324	46.25											324	22.175		324	17.417
325	62.197											325	16.316		325	21
326	50.267											326	14		326	18.417
327	79.359											327	19.754		327	17.241
328	68.783											328	17		328	23.09
329	71.129											329	24.13		329	19.583
330	50.938											330	14.867		330	16
331	65.372											331	23.547		331	19.721
332	70.944											332	15.659		332	16.857
333	68.635											333	19.707		333	24.602
334	77.929											334	20.118		334	27.007
335	50.4											335	17.362		335	19.093
336	58.795											336	38.825		336	16.091
337	48.263											337	19.852		337	19.529
338	73.673											338	16.714		338	44.452
339	75.652											339	16.845		339	28.742
340	66.034											340	15.812		340	19.55
341	47.545											341	16.889		341	17.125
342	55.759											342	17.202		342	23.508
343	47.9											343	19.361		343	23.333
344	60.043											344	14.286		344	20.179
345	62.257											345	19.568		345	26.615
346	48.4											346	21.688		346	23.446
347	74.443											347	14.375		347	23.203
348	47.071											348	19.143		348	21.769
349	70.982											349	17.7		349	19.638
350	75.5											350	27.886		350	16.667
351	59.222											351	14.429		351	17.722
352	47.6											352	15		352	20.207
353	92.204											353	15.638		353	24.473
354	89.213											354	20.258		354	16.667
355	45.769											355	26.151		355	16.714
356	80.977											356	16.769		356	18.611
357	78.556											357	14.682		357	38.818
358	80.143											358	14.667		358	22.621
359	64.467											359	19.25		359	17.476
360	66.632											360	20.833		360	21.189
361	73											361	15.417		361	26.087
362	83.275											362	18.354		362	16.684
363	68.63											363	19.173		363	19.889
364	52.475											364	23.051		364	18
365	61.238											365	18.429		365	25.701
												366	14.545		366	16.441
												367	16		367	19.5
												368	19.775		368	17.393
												369	19.167		369	17.316
												370	13.818		370	20.444
												371	14.366		371	22
												372	14.167		372	19.75
												373	15.491		373	17.071
												374	15.929		374	20.862
												375	19.775		375	27.464
												376	18.619		376	22.923
												377	19.148		377	16.25
												378	18.286		378	17.737
												379	15.286		379	31.294
												380	17.608		380	16.143
												381	15.931		381	32.796
												382	18.925		382	22.092
												383	30.978		383	16.833
												384	18.429		384	16.167
												385	18.921		385	19.265
												386	20.917		386	16.905
												387	21.417		387	19.812
												388	14.769		388	21.591
												389	20.242		389	24.85
												390	20.419		390	18.294
												391	17.179		391	40.689
												392	15.867		392	19.938
												393	23.212		393	19.647
												394	19.369		394	23.247
												395	26.794		395	17.95
												396	18.433		396	22.569
												397	17.273		397	19.545
												398	18.564		398	18.315
												399	14.3		399	19.25
												400	17.036		400	22.832
												401	15.5		401	21.429
												402	18.778		402	21.875
												403	23.051		403	18.882
												404	16.25		404	27.46
												405	13.955		405	17.627
												406	17.133		406	27.522
												407	19.2		407	22.481
												408	22.085		408	16.909
												409	15.765		409	18.167
												410	21.701		410	24.723
												411	14.538		411	16.4
												412	13.8		412	19.458
												413	16.056		413	19.833
												414	22.399		414	19.656
												415	27.428		415	21.081
												416	22.27		416	18.5
												417	19.638		417	16.412
												418	17.946		418	21.211
												419	14		419	15.857
												420	17.359		420	22.448
												421	14.667		421	15.895
												422	23.811		422	16.9
												423	14.2		423	16.429
												424	19.25		424	19.143
												425	15.5		425	17.4
												426	16.278		426	16.789
												427	13.429		427	22.882
												428	16.913		428	27.565
												429	18.846		429	17.4
												430	18.778		430	22.63
												431	14.923		431	25.042
												432	16.412		432	17.263
												433	14.846		433	25.135
												434	22.604		434	17.962
												435	16.714		435	20.694
												436	16		436	24.963
												437	26		437	21.213
												438	16.25		438	21.32
												439	22.933		439	17.111
												440	20.525		440	19.045
												441	15.909		441	19.387
												442	16.167		442	16.25
												443	14.615		443	22.577
												444	20.366		444	23.41
												445	14.5		445	21.604
												446	14.267		446	18.533
												447	47.486		447	18.844
												448	19.873		448	18.818
												449	15.6		449	21.826
												450	21.254		450	23.029
												451	19.667		451	40.325
												452	15.156		452	17.308
												453	15.421		453	27.062
												454	15.417		454	15.8
												455	14.214		455	27.44
															456	16.5
															457	16.643
															458	15.5
															459	21.266
															460	17.9
															461	19.462
															462	21.261
															463	20.359
															464	18.1
															465	20
															466	16.1
															467	19.75
															468	19.558
															469	26.333
															470	23.947
															471	19.944
															472	18.923
															473	19.56
															474	18

## Sheet: Fig.1G_IMS(GTP)
Ctrl1			Ctrl2			Ctrl3			MMF1			MMF2			MM3
Average	96.3891		Average	78.9931		Average	65.2928		Average	73.2529		Average	60.7966		Average	60.606
	mean			mean			mean			mean			mean			mean
1	92.714		1	94.529		1	55		1	77.286		1	56.889		1	44.667
2	83.682		2	53.471		2	61.571		2	85.176		2	44.667		2	52.846
3	104		3	69.188		3	79.409		3	70.571		3	48.25		3	57.308
4	79		4	63.9		4	58.438		4	57.167		4	67.556		4	100.425
5	72.3		5	60.692		5	56.259		5	56.667		5	56.375		5	39.5
6	119.824		6	64.714		6	63.538		6	55.769		6	48.333		6	75.471
7	69.333		7	97.769		7	79		7	65.875		7	48.926		7	60.809
8	65.333		8	89.458		8	82.111		8	197.72		8	66.5		8	173.709
9	83.5		9	96		9	65.95		9	196.969		9	198.171		9	56.405
10	83.25		10	94.939		10	47.6		10	191.737		10	195.381		10	185.831
11	204.21		11	73.25		11	79.387		11	70		11	189.93		11	168.649
12	200.222		12	87.9		12	62.875		12	221.27		12	223.329		12	190.01
13	200.086		13	54.667		13	69.81		13	178.379		13	178.306		13	60.16
14	130.938		14	56.545		14	198.293		14	58		14	50.895		14	55.154
15	223.671		15	198.012		15	194.918		15	63.5		15	89.812		15	46.625
16	189.716		16	200.298		16	190.98		16	121.312		16	46.923		16	69.75
17	67.333		17	190.51		17	81.4		17	245		17	41.667		17	53.125
18	89.571		18	116.467		18	223.384		18	61.444		18	56.733		18	82.259
19	80.833		19	80.4		19	178.911		19	55.792		19	62.125		19	61.593
20	100.107		20	223.329		20	63.167		20	91.393		20	68.5		20	43.917
21	107.6		21	179.366		21	47.333		21	61.5		21	50		21	166.942
22	110.146		22	56		22	67.846		22	62.375		22	49.667		22	56.917
23	88.292		23	56.667		23	76.872		23	52.818		23	44.333		23	71.75
24	172.855		24	69.5		24	81.169		24	66.667		24	49.333		24	57.714
25	109.833		25	109.246		25	68.357		25	61.079		25	245		25	51.952
26	157.987		26	58.308		26	59.75		26	71.444		26	70.25		26	44
27	75.812		27	81.333		27	44.4		27	91.308		27	50.75		27	50.75
28	245		28	84.175		28	75.5		28	81.485		28	46.333		28	68.091
29	86.304		29	94.074		29	245		29	54.667		29	63.688		29	52.913
30	106.463		30	76.889		30	71.558		30	73.656		30	41		30	47.545
31	101.294		31	94.3		31	48		31	90.857		31	53.438		31	49.667
32	111.158		32	76.125		32	94.436		32	56.333		32	53.5		32	79.16
33	103.182		33	90.815		33	128.188		33	60.667		33	74.75		33	63.583
34	85.083		34	91.969		34	55.88		34	84.962		34	67.938		34	88.469
35	174.367		35	245		35	73.391		35	55.5		35	45.136		35	52
36	99.562		36	90.875		36	53.125		36	55.333		36	52.889		36	245
37	93.387		37	61.833		37	56.438		37	57.471		37	67.5		37	56.476
38	73.08		38	58		38	83.227		38	87.538		38	42.833		38	60.154
39	101.625		39	58.286		39	64.449		39	50.455		39	45.692		39	79.7
40	71.667		40	72.125		40	57		40	91.762		40	52.421		40	62.643
41	97.375		41	71.679		41	86.558		41	53.667		41	44		41	42.2
42	112.882		42	62.615		42	66.72		42	93.537		42	43.273		42	48.667
43	83.684		43	53.25		43	74.302		43	68.438		43	44		43	71.375
44	72.923		44	64.367		44	79.56		44	57		44	66.909		44	71.647
45	72.833		45	73.6		45	88.186		45	67.5		45	44		45	43.7
46	96.525		46	89		46	61.188		46	84.75		46	47.923		46	91.531
47	72.375		47	69.375		47	63.28		47	69.607		47	77.904		47	62.194
48	167.739		48	113.258		48	57.808		48	53.4		48	74.938		48	59.941
49	118.667		49	77.5		49	85.273		49	52.6		49	95.13		49	68.185
50	102.467		50	87.95		50	48		50	49.167		50	53.018		50	111.219
51	104.262		51	61.529		51	64.191		51	64.7		51	46.154		51	70.278
52	126.656		52	113.452		52	74.32		52	52.333		52	41.643		52	49.071
53	98.75		53	72.5		53	54.4		53	76.731		53	70.1		53	77.493
54	104.174		54	72.917		54	79.925		54	86.25		54	46		54	43.417
55	92.176		55	70.917		55	56.909		55	55.722		55	61.938		55	53.333
56	66.909		56	99.667		56	51.875		56	56.421		56	69.5		56	52.167
57	81.789		57	112.387		57	78		57	83.538		57	47		57	48.688
58	73.5		58	76.582		58	91.843		58	116.875		58	66.75		58	59.692
59	87.586		59	64.231		59	68.579		59	72.077		59	42.8		59	48.133
60	90.667		60	107.167		60	85.392		60	98.619		60	48.333		60	52.565
61	69.8		61	61.692		61	58.407		61	66.562		61	85		61	84.125
62	71		62	72.4		62	77.958		62	60.875		62	46.333		62	71.476
63	164.061		63	54.833		63	80.949		63	52.667		63	58.048		63	63.917
64	102.75		64	57.2		64	55.955		64	77.036		64	59.25		64	41.818
65	86.875		65	82.833		65	55.438		65	47.455		65	52		65	64.75
66	76		66	94.816		66	53.6		66	88.667		66	48.667		66	58
67	105.111		67	81.75		67	65.26		67	108.344		67	47.333		67	55.913
68	81.091		68	72.833		68	54.286		68	86.76		68	50.812		68	47.96
69	71.214		69	59.556		69	69.231		69	59.667		69	41.273		69	63.091
70	106.333		70	125.344		70	75.605		70	56.875		70	58.963		70	41.5
71	100.5		71	75.462		71	46.769		71	82.588		71	48.333		71	47.462
72	86.9		72	63		72	82.091		72	81.128		72	46.5		72	69.281
73	71.154		73	57.385		73	79.375		73	92.675		73	94.531		73	71.556
74	65.333		74	73.943		74	55.429		74	74.5		74	71.466		74	71.091
75	68.143		75	87.5		75	63		75	54		75	41.455		75	39.8
76	110.349		76	67.333		76	77.008		76	87.778		76	68.955		76	44.062
77	109.143		77	63.143		77	50.15		77	57.923		77	49.958		77	61.053
78	154.25		78	81.75		78	81.629		78	58.154		78	62.404		78	47.724
79	77.571		79	68.333		79	51.55		79	56.667		79	42.7		79	47.5
80	76.923		80	65.333		80	45.6		80	62.786		80	62.714		80	48.6
81	110.139		81	145.98		81	54.917		81	81.875		81	44.688		81	66.524
82	72		82	72.222		82	74.855		82	62.486		82	74.167		82	53.56
83	84		83	78.5		83	56.333		83	51.667		83	145.472		83	57.875
84	67.4		84	98.075		84	82.586		84	143.574		84	46.2		84	61.286
85	147.788		85	93.231		85	55.115		85	88.256		85	59		85	49.25
86	70.818		86	66.667		86	68.458		86	77.255		86	41		86	99.375
87	80.207		87	69.188		87	66.625		87	52.154		87	43.667		87	44.6
88	79.438		88	61		88	74.812		88	102.976		88	50		88	64.088
89	126.395		89	71.194		89	53.125		89	84.333		89	53.538		89	57.375
90	141.716		90	66.087		90	60.525		90	54.167		90	56.5		90	69.93
91	100.923		91	60.062		91	57.375		91	59.643		91	44.667		91	65.125
92	80.333		92	63.529		92	86.591		92	52.667		92	47.769		92	50.438
93	111.333		93	59.269		93	47.773		93	79.395		93	44		93	46.529
94	91.25		94	75.97		94	49.8		94	52.5		94	45.5		94	62
95	78.154		95	69		95	48.5		95	62.375		95	80.018		95	70.92
96	86		96	59.2		96	82.857		96	56.667		96	55.75		96	63
97	83.385		97	64.8		97	74.091		97	47.786		97	46.733		97	64.96
98	71.923		98	57.333		98	67.667		98	69		98	54.75		98	62.125
99	101.267		99	57.364		99	73.6		99	63.333		99	44		99	59.375
100	72.625		100	80.667		100	55.968		100	59.333		100	72.438		100	55.235
101	112.712		101	80.914		101	47.833		101	68.625		101	53.273		101	62.889
102	112.769		102	53.333		102	77		102	77.938		102	59.836		102	51.147
103	114.692		103	62.4		103	59.722		103	77.839		103	67.255		103	47.182
104	109.812		104	81.149		104	67.317		104	50.667		104	59.229		104	57.804
105	66.667		105	94.296		105	58.545		105	86.149		105	77.939		105	51
106	81.273		106	65.385		106	49.32		106	91.704		106	54.875		106	62.875
107	106.882		107	64.75		107	58.375		107	85.728		107	53.136		107	49
108	70.75		108	67.431		108	50.154		108	53.667		108	57.5		108	75.913
109	110.615		109	57.818		109	67.562		109	73.765		109	48.25		109	72.783
110	82.125		110	125.55		110	48.333		110	64.077		110	40.833		110	54.944
111	77.857		111	86.571		111	65.78		111	62.583		111	77.812		111	52.875
112	87.684		112	55.333		112	55.062		112	72.308		112	50.923		112	60.35
113	78.286		113	92.25		113	59.706		113	55.611		113	87.905		113	57.818
114	120.094		114	93.082		114	47.333		114	83.2		114	77.259		114	57.882
115	119.36		115	68.87		115	48.385		115	78.857		115	43.667		115	75.091
116	95.938		116	57.5		116	60.875		116	81.269		116	53.5		116	51.889
117	93.103		117	84.742		117	60.75		117	81.75		117	49		117	101.703
118	74.818		118	92.233		118	78.877		118	78.097		118	56.562		118	63.172
119	108.793		119	60		119	78		119	102.086		119	58.4		119	60.378
120	130.25		120	82.937		120	71.753		120	53.75		120	62.045		120	46.63
121	136.131		121	54.545		121	72.55		121	86.195		121	54.55		121	83.607
122	104.167		122	57.8		122	57.688		122	62.5		122	48.5		122	64.059
123	95.369		123	66.714		123	67.346		123	63.5		123	50.5		123	65.152
124	76		124	87.111		124	53.6		124	55.75		124	66.085		124	49
125	78.387		125	92.132		125	52.438		125	80.182		125	55.556		125	52.312
126	71.667		126	69.5		126	48.6		126	54.333		126	42.333		126	56
127	69.118		127	69.562		127	131.291		127	106.061		127	64.267		127	59.206
128	75.091		128	58.227		128	77.357		128	56.636		128	45.727		128	49.667
129	83.375		129	65.297		129	83.818		129	98.75		129	65.038		129	51.5
130	86.167		130	79.111		130	43.632		130	71.31		130	65.8		130	55
131	74.571		131	82.148		131	60.5		131	71		131	62.938		131	46
132	81		132	129.14		132	44.417		132	58		132	53.375		132	48.812
133	85.885		133	71.188		133	69.812		133	51.333		133	42.077		133	50.667
134	76.583		134	84.292		134	52.692		134	51.667		134	69.457		134	63.833
135	95.745		135	68.029		135	67.6		135	66.75		135	71.35		135	48.333
136	133.188		136	66.5		136	84.122		136	83.653		136	54		136	57.4
137	123.357		137	64.75		137	50.133		137	74.5		137	71.312		137	47
138	87.846		138	83.25		138	62		138	61.25		138	74.471		138	71.9
139	74		139	71.3		139	65.5		139	73.414		139	44.571		139	49.682
140	103.755		140	57.182		140	69.593		140	78.762		140	50.727		140	74.929
141	75.727		141	67		141	87.27		141	76.75		141	59		141	103.625
142	72		142	69.208		142	80.407		142	73.81		142	51.714		142	47.273
143	99.688		143	86.914		143	72.138		143	59.857		143	66.5		143	48.111
144	104.361		144	59.214		144	65.3		144	52.333		144	45		144	57.212
145	112.382		145	70.923		145	59.654		145	58.571		145	57.512		145	59.361
146	83.304		146	75.062		146	47.167		146	58.818		146	45.091		146	66.056
147	114.128		147	99.55		147	77.125		147	60.294		147	44.333		147	68.349
148	135.284		148	90.633		148	72.444		148	52.667		148	52.837		148	54.2
149	109.686		149	79.233		149	65.391		149	107.5		149	47.6		149	58.071
150	97.245		150	80.959		150	54.882		150	70.324		150	57.487		150	52.5
151	79.474		151	67.103		151	70.971		151	49.692		151	71.667		151	74.296
152	72.211		152	74.667		152	76.225		152	72.5		152	45.409		152	79.424
153	103.5		153	70.688		153	122.474		153	65.5		153	64.135		153	81.636
154	110.063		154	72.042		154	60.25		154	72.469		154	68.417		154	82.75
155	83.184		155	81.609		155	61.143		155	63.273		155	55.583		155	64.609
156	79.714		156	52.692		156	70.021		156	114.865		156	49.333		156	50.4
157	70		157	87.2		157	63.921		157	69.727		157	65.92		157	47.1
158	73.059		158	69.672		158	70.281		158	69.5		158	63.833		158	117.816
159	78.062		159	103.781		159	117.264		159	100.362		159	93.59		159	72.026
160	70.909		160	77.333		160	58.483		160	83.923		160	75.962		160	58.411
161	88.929		161	82.042		161	50.85		161	91.333		161	48.522		161	65.812
162	77.778		162	62.067		162	66.773		162	60.769		162	128.394		162	66.75
163	90.611		163	119.238		163	65.625		163	52.286		163	86.927		163	51.5
164	84.927		164	58.167		164	79.951		164	69.472		164	45.538		164	41.077
165	98.711		165	93.685		165	44.312		165	61.538		165	44.154		165	45.897
166	98.937		166	60.714		166	103.424		166	71.645		166	51.333		166	86.027
167	109.761		167	121.52		167	53.385		167	81.5		167	57.444		167	84.216
168	66.364		168	108.212		168	63.041		168	59		168	43.667		168	48.312
169	93.471		169	72.333		169	62.678		169	64.75		169	74.815		169	68.381
170	87.955		170	70.556		170	53.727		170	65.357		170	115.623		170	49.833
171	80.125		171	70.5		171	46.667		171	112.042		171	42.333		171	48.8
172	70.364		172	91.25		172	66		172	56.154		172	41		172	47.333
173	114.277		173	86.773		173	47.375		173	54		173	59.857		173	81.725
174	122.531		174	127.388		174	49.136		174	59.857		174	50.556		174	44.588
175	104.571		175	119.708		175	48.263		175	55.353		175	61.5		175	60.618
176	89.536		176	61.083		176	72.287		176	69.667		176	70.281		176	66.318
177	134.698		177	60.636		177	63.533		177	67.509		177	43		177	53.471
178	105.596		178	59.429		178	82.589		178	62.625		178	76.667		178	46.231
179	116.75		179	83.5		179	45.35		179	58.667		179	69.143		179	84.667
180	139.252		180	64.727		180	74.262		180	163.639		180	47.909		180	52.5
181	66.5		181	119.03		181	51.737		181	106.688		181	58.25		181	78.165
182	104.206		182	75		182	58.478		182	72.05		182	41.8		182	81.982
183	185.167		183	54		183	71.214		183	81.208		183	43.643		183	44.6
184	68.333		184	82.105		184	93.433		184	69.718		184	67.294		184	61.25
185	71.667		185	95		185	69.5		185	76		185	83.825		185	53.457
186	74.667		186	66.308		186	63.95		186	65.737		186	75.5		186	40.143
187	106.753		187	59.667		187	54.292		187	59		187	67.5		187	42.65
188	81.845		188	129.795		188	63.568		188	49.818		188	79.139		188	43.7
189	105		189	57		189	56.9		189	90.336		189	66.25		189	56.303
190	73.231		190	103.289		190	47.214		190	73.467		190	90.103		190	106.81
191	88.543		191	109.404		191	76.692		191	55		191	45.923		191	82.684
192	105.776		192	106.314		192	77.261		192	71.459		192	42.667		192	69.724
193	80.562		193	68.064		193	46.846		193	84.483		193	46.333		193	67.021
194	69.542		194	85.375		194	48.5		194	51.385		194	54.375		194	56.905
195	124.056		195	78.889		195	71.25		195	53.667		195	48.25		195	52.2
196	74.111		196	111.167		196	63.762		196	62.438		196	73.5		196	43.941
197	71.75		197	63.385		197	63.545		197	73.875		197	74.938		197	69.492
198	98.111		198	68.111		198	72.192		198	56.938		198	51.5		198	60.875
199	92.929		199	64.6		199	53.698		199	70.5		199	63.625		199	55.053
200	87.235		200	126.698		200	79.738		200	66.2		200	66.643		200	65.105
201	67.455		201	72.179		201	55		201	95.188		201	44.333		201	57.449
202	106.863		202	81.9		202	44.083		202	64.125		202	53.406		202	58.7
203	69.8		203	137.98		203	48.182		203	60		203	47.059		203	57.176
204	76.111		204	80.125		204	61.706		204	108.805		204	58.531		204	55.717
205	147.366		205	56.75		205	83.488		205	86.241		205	77.344		205	71.393
206	93		206	90.098		206	79.143		206	82.613		206	66.481		206	65.667
207	127.902		207	79.85		207	53.667		207	91.438		207	46		207	78.524
208	74.667		208	84.354		208	54.125		208	74.333		208	48.875		208	46
209	88		209	86.688		209	67.36		209	88.5		209	56.75		209	45
210	82.676		210	59.385		210	85		210	62.438		210	55.562		210	46.438
211	74.407		211	114.588		211	52.333		211	59		211	50.273		211	45.071
212	112.805		212	83.596		212	59.5		212	60.125		212	42.762		212	73.083
213	111.493		213	108.136		213	56.7		213	73.526		213	44		213	56.308
214	85.37		214	95.346		214	48.75		214	57.909		214	42.3		214	44.154
215	103.05		215	85.186		215	56.25		215	63.353		215	53.438		215	89.031
216	112.556		216	74.226		216	46.6		216	78.603		216	56.171		216	57.882
217	97.866		217	63.462		217	49.857		217	71.125		217	46.308		217	60.25
218	79		218	61.862		218	62.8		218	77.737		218	82.422		218	67.2
219	82.75		219	62.077		219	51.917		219	111.49		219	73.838		219	64.148
220	79.042		220	59.412		220	67.414		220	90.1		220	80.061		220	60.971
221	93.089		221	79.041		221	61.875		221	77.149		221	60.652		221	44.778
222	104.8		222	66.231		222	50.727		222	81.85		222	71.432		222	50.727
223	94.25		223	84.848		223	62		223	70.5		223	61.75		223	57.1
224	90.786		224	99.222		224	69.314		224	61.5		224	68.536		224	67.156
225	98.913		225	65.184		225	70.174		225	67		225	50.357		225	47.167
226	76.4		226	84.865		226	59.643		226	53.333		226	53.833		226	60
227	69		227	74.143		227	72.625		227	56.308		227	68.464		227	62.875
228	85.625		228	69.885		228	53.059		228	57.308		228	49.571		228	61.882
229	77.176		229	63		229	53.278		229	83		229	56.5		229	71.583
230	85.357		230	66.577		230	63.333		230	76.167		230	43.067		230	78.493
231	83		231	85.122		231	47.684		231	74.5		231	43.654		231	43.833
232	69.846		232	106.256		232	59.312		232	58.231		232	65.158		232	45.067
233	83		233	63.2		233	54.13		233	69.143		233	58.562		233	45.917
234	103.909		234	63.111		234	64.571		234	78.75		234	45.656		234	61.25
235	94.463		235	84.425		235	70.551		235	55.25		235	49.714		235	41.818
236	127.584		236	92.296		236	49.75		236	92.93		236	50		236	42.2
237	72		237	96.571		237	57.094		237	64.857		237	68.25		237	69.082
238	71.167		238	82.726		238	74.875		238	76.062		238	42.667		238	70.231
239	99.888		239	86.188		239	73.812		239	54.5		239	60.125		239	48.75
240	80.25		240	78.925		240	47.154		240	75.889		240	47.167		240	69.091
241	82		241	104.607		241	46		241	63.5		241	76.537		241	56.1
242	71.167		242	100.553		242	85.889		242	94.125		242	78.679		242	44.5
243	131.188		243	109.571		243	52.24		243	85.9		243	95.395		243	48.864
244	112.143		244	78.938		244	73.207		244	91.662		244	73.8		244	53
245	96.778		245	79		245	72.5		245	65.667		245	75.575		245	51.5
246	87.75		246	64.658		246	54.375		246	76.5		246	41.333		246	61.938
247	69.4		247	70.6		247	47.636		247	61.444		247	65.562		247	56.15
248	99.324		248	98.568		248	78		248	62.484		248	43.733		248	45.143
249	78.625		249	89.758		249	70.714		249	76.8		249	63.118		249	84
250	93.226		250	63.414		250	74.857		250	54.2		250	68.938		250	42.6
251	84.091		251	87.75		251	50.833		251	75.405		251	72.939		251	83.412
252	80		252	56.667		252	114.841		252	59		252	57.5		252	96.556
253	120.731		253	98.775		253	57.12		253	67.222		253	50.375		253	59.3
254	97.6		254	128.897		254	74.091		254	87.615		254	44		254	48.8
255	71.857		255	79.25		255	49.1		255	95.432		255	47.786		255	43.5
256	97.429		256	83.8		256	73.973		256	102.15		256	56.239		256	55.091
257	104.962		257	86.812		257	51.2		257	67.611		257	74.305		257	59.22
258	79.304		258	113.635		258	63.12		258	56.167		258	70.179		258	64.824
259	115.796		259	72.167		259	44.4		259	59.045		259	61.667		259	66.023
260	78.593		260	56.769		260	63.6		260	53.667		260	86.077		260	66.327
261	98.783		261	70		261	62.61		261	93.182		261	51.875		261	58.8
262	108.5		262	73.5		262	44.727		262	68.5		262	59		262	58.75
263	141.524		263	82.111		263	66.406		263	54.2		263	53.375		263	52.923
264	69		264	72.25		264	67.222		264	75.875		264	50.75		264	61.385
265	100.5		265	99.037		265	80.4		265	66.5		265	84.049		265	58.75
266	123.091		266	95.688		266	68.308		266	63.857		266	83.078		266	47.25
267	79.5		267	100.146		267	82.059		267	52.667		267	80.643		267	69.045
268	75.25		268	73.65		268	44.833		268	65.481		268	44.667		268	43.333
269	74		269	55.077		269	49.571		269	74.533		269	42.667		269	77.786
270	67.25		270	115.463		270	45.4		270	73.397		270	56.73		270	44.312
271	116.778		271	71.25		271	57.091		271	74.071		271	52.5		271	62.015
272	100.205		272	56.8		272	67.592		272	56.167		272	46.667		272	79.457
273	73		273	111.062		273	70.297		273	79.692		273	64.448		273	46.625
274	104.25		274	59.455		274	48.412		274	86.417		274	57.333		274	51.375
275	115.701		275	61.529		275	47.55		275	71.5		275	67		275	45.909
276	82.75		276	66.556		276	50.429		276	77.75		276	58.875		276	69.868
277	77.103		277	82.087		277	86.619		277	88.375		277	57.774		277	113.706
278	89.731		278	99.386		278	85.721		278	73.044		278	45.357		278	52.043
279	87.25		279	64.538		279	64.077		279	85.552		279	46.938		279	71.174
280	159.59		280	61.2		280	44.182		280	90.689		280	42.667		280	42.818
281	136.25		281	57		281	51		281	69.083		281	74.648		281	82.606
282	136.216		282	93.965		282	73.259		282	57		282	71.312		282	76.5
283	76.889		283	59		283	62.6		283	56		283	58.235		283	44.167
284	73		284	102.442		284	71.71		284	55.692		284	53.125		284	57.5
285	68.409		285	88.095		285	116.595		285	50.667		285	50.571		285	74.75
286	74		286	66.174		286	48.167		286	64.833		286	58.875		286	54.023
287	108.875		287	84.113		287	69.794		287	81.667		287	54.538		287	57.875
288	73.444		288	73.125		288	64.236		288	81.2		288	69.667		288	61.487
289	137.727		289	90.733		289	50.333		289	56.273		289	49.538		289	44.4
290	78.143		290	89.462		290	78.775		290	96.955		290	45.714		290	52
291	73.538		291	113.606		291	48.562		291	61.214		291	107.818		291	63.793
292	120.875		292	80.857		292	58.149		292	67.75		292	47.333		292	47.167
293	130.545		293	56.9		293	53.682		293	59		293	39.091		293	62.278
294	89.865		294	69.071		294	71.481		294	57.727		294	61.5		294	68.852
295	74.667		295	59		295	66.58		295	82.175		295	56.5		295	45.667
296	104.797		296	89.318		296	50.5		296	53.615		296	62.5		296	97.63
297	179.272		297	59.571		297	75.967		297	62.5		297	102.97		297	47.583
298	100.1		298	61.846		298	63.545		298	63		298	66.938		298	62.533
299	93		299	82.349		299	53.188		299	85		299	58.688		299	45.6
300	109.683		300	120.408		300	59.1		300	60.231		300	60.5		300	42.4
301	71.026		301	57.737		301	46.538		301	59.167		301	59.375		301	44.4
302	90.188		302	99.086		302	45.6		302	53.667		302	70		302	41.818
303	106.75		303	99.852		303	53.312		303	79.339		303	54.75		303	66.933
304	73.059		304	81.434		304	51.348		304	58.611		304	47.333		304	62.083
305	80.312		305	64		305	55.2		305	63.071		305	41		305	69
306	87.5		306	58.412		306	54.4		306	52.438		306	115.116		306	46.5
307	75.727		307	171.829		307	51.714		307	68.052		307	61.222		307	53.812
308	101.574		308	89.833		308	88.676		308	53.667		308	51.769		308	56
309	97.062		309	79.75		309	61.548		309	61.875		309	114.1		309	66.727
310	116.877		310	59.167		310	44.923		310	54.062		310	112.545		310	68.25
311	94.667		311	59.909		311	77.812		311	74.5		311	46		311	43.2
312	68.5		312	73.5		312	58.75		312	78.111		312	42.8		312	57.897
313	81.875		313	84.082		313	74.182		313	106.531		313	47.677		313	61.891
314	67.75		314	89.023		314	60.534		314	67.6		314	72.763		314	51.167
315	63.417		315	89.745		315	47.333		315	53		315	75.5		315	49.625
316	93.882		316	84.607		316	54.719		316	72.688		316	82.025		316	61.811
317	127.721		317	74.75		317	94.45		317	77.222		317	74.5		317	49.45
318	72.614		318	71.844		318	81.405		318	59		318	59.222		318	56.941
319	86.105		319	73.222		319	47.357		319	78.625		319	45.565		319	43.25
320	137.859		320	54.833		320	67.269		320	84.625		320	72.633		320	47.625
321	123.921		321	88.881		321	67.88		321	64.714		321	39.692		321	40
322	99.103		322	76.55		322	49		322	74.5		322	65.281		322	52.679
323	114.5		323	54.333		323	74.532		323	79.179		323	44.625		323	63
324	104.75		324	68.438		324	44.6		324	64.588		324	41.5		324	78.306
325	84		325	74.831		325	69.508		325	72.95		325	49.077		325	43.125
326	121.583		326	68.5		326	52.138		326	54.667		326	61.312		326	75.718
327	74.75		327	70.95		327	52.083		327	56.222		327	45.167		327	104.825
328	77.231		328	89.012		328	56.625		328	54.211		328	58.75		328	48.75
329	92.018		329	61.5		329	49.2		329	53.733		329	47.182		329	50.842
330	84.35		330	71.875		330	71.793		330	82.25		330	75.167		330	66.472
331	114.891		331	92.857		331	59.25		331	63.409		331	99.82		331	75.348
332	155.953		332	62.857		332	62.878		332	53.75		332	48.111		332	64.042
333	101.495		333	99.533		333	74.5		333	91.333		333	49.25		333	45
334	75.121		334	103.083		334	51.257		334	94.379		334	52.938		334	76.696
335	67.4		335	73.8		335	76.043		335	65.812		335	62.737		335	44.25
336	100.143		336	69.125		336	46		336	52.5		336	67.508		336	47.176
337	79.375		337	77.842		337	58.722		337	56.667		337	57.75		337	51.438
338	113.351		338	60.875		338	48.231		338	54.167		338	56.5		338	50.75
339	70.188		339	58.2		339	64.76		339	101.188		339	67.35		339	41.2
340	90.618		340	83.122		340	50.55		340	58.333		340	55.115		340	59.588
341	69.938		341	55.333		341	103.226		341	76.1		341	71.946		341	86.568
342	99.475		342	59.833		342	63.556		342	91.533		342	63.286		342	84.865
343	87.792		343	75.429		343	55		343	59		343	74.556		343	43
344	127.512		344	100.281		344	57.318		344	78.345		344	48.333		344	78.651
345	77.077		345	64.231		345	46.2		345	109.667		345	42.333		345	60.968
346	92.308		346	68		346	79.968		346	54.789		346	55.435		346	86.909
347	81.183		347	115.543		347	60.2		347	58.654		347	89.273		347	57.964
348	146.485		348	98.625		348	46.182		348	57.083		348	59.867		348	68.188
349	117.409		349	99.312		349	100.667		349	115.562		349	69.5		349	85.956
350	136.57		350	66.462		350	48.167		350	72.086		350	47.333		350	52.125
351	78.824		351	68.433		351	66.55		351	79.667		351	44.857		351	51.222
352	99.043		352	78.625		352	51.812		352	72.067		352	80.818		352	47.364
353	106.136		353	78.062		353	58.556		353	61.241		353	43.444		353	56.833
354	64.857		354	72		354	61.5		354	78.059		354	86.212		354	55.125
355	67.364		355	56		355	46.286		355	64.75		355	67.714		355	70.647
356	124.514		356	66.857		356	60.111		356	87.529		356	70.308		356	73.704
357	85.741		357	73.677		357	73.03		357	85.588		357	46.083		357	61.8
358	80.667		358	120.719		358	66.949		358	82.923		358	41.333		358	45.667
359	73.231		359	81.565		359	53.184		359	83.667		359	70.083		359	121.875
360	71.5		360	95		360	72.4		360	120		360	50.75		360	112.062
361	129.047		361	93.5		361	48.2		361	72.25		361	48.682		361	109.625
362	100.348		362	63.889		362	68.148		362	102.333		362	79.625		362	41.3
363	85.9		363	77.652		363	71.25		363	86		363	100.545		363	47.9
364	85.84		364	117.811		364	56		364	69.75		364	58.062		364	49.5
365	99.773		365	66.091		365	60.625		365	52.2		365	42.769		365	47.889
366	81.75		366	58		366	77.795		366	67		366	43.786		366	73.125
367	129.128		367	72.667		367	60		367	53.6		367	82.938		367	67.655
368	114.538		368	64.857		368	71.029		368	87.192		368	80.316		368	47.692
369	88		369	66		369	57.562		369	56.75		369	52.5		369	42.6
370	124.438		370	61		370	57.611		370	78.25		370	67.136		370	55.188
371	126.871		371	113.571		371	73.132		371	116.944		371	50.667		371	40.875
372	71		372	55.667		372	49.062		372	59.7		372	62.333		372	60.083
373	80.839		373	82.286		373	66.765		373	61.969		373	44		373	54.926
374	125.629		374	64.409		374	60.556		374	57.769		374	67.182		374	53.111
375	112.25		375	122.475		375	52.643		375	58.667		375	44.333		375	55.536
376	148.633		376	101.062		376	51.75		376	62.333		376	74.5		376	56.333
377	114.821		377	73.5		377	86.184		377	90.75		377	47.458		377	64
378	89.143		378	66.571		378	58		378	56.154		378	44.9		378	41.4
379	102.818		379	72.278		379	74.091		379	103		379	67.167		379	44.424
380	77.118		380	92.65		380	102.67		380	78.188		380	49.333		380	66.25
381	115.867		381	75.941		381	51.875		381	78.25		381	85.455		381	86.098
382	77		382	96.5		382	53.812		382	81.333		382	86.75		382	50.75
383	73.143		383	55.533		383	86.87		383	52.615		383	72.969		383	43.857
384	77.133		384	56		384	54.32		384	86.343		384	83.455		384	73.143
385	69.667		385	76.25		385	45.762		385	52.154		385	45.143		385	66.957
386	101		386	82.717		386	76.9		386	89.259		386	48		386	59.308
387	99.438		387	57.75		387	53.2		387	86.688		387	60.077		387	44.4
388	70.423		388	86.562		388	48.737		388	80.208		388	79		388	52.913
389	83.25		389	79.143		389	63.048		389	104.839		389	93.548		389	49.44
390	79.833		390	80.774		390	54.875		390	96.455		390	50.325		390	44.25
391	101.833		391	78.022		391	58.875		391	63.15		391	75.028		391	42.571
392	79.412		392	108.447		392	52.917		392	73.826		392	44.967		392	44.1
393	158.107		393	58.375		393	91.776		393	73.312		393	42.667		393	64.676
394	88.913		394	112.907		394	45.7		394	59.077		394	59.938		394	63.778
395	84.686		395	58		395	55.96		395	67.286		395	54.857		395	46
396	84.289		396	71.556		396	53.6		396	51.357		396	46.333		396	75.941
397	67.833		397	83.9		397	55.361		397	91.842		397	45.333		397	55.125
398	94.424		398	71.375		398	87.25		398	67.5		398	66.182		398	49.15
399	92.333		399	73.312		399	73.5		399	75.429		399	89.333		399	54.789
400	98.829		400	90.875		400	50.278		400	52.364		400	42.8		400	53.941
401	75.385		401	65.6		401	72.728		401	61		401	50.235		401	61.75
402	105.5		402	61.481		402	72.511		402	69.472		402	67		402	90.598
403	114.722		403	63.5		403	70.421		403	51		403	56.833		403	51.286
404	81		404	69.955		404	77.3		404	80.167		404	59		404	56.577
405	71		405	99.115		405	53.85		405	67.889		405	59.042		405	48
406	80.875		406	92.63		406	69.35		406	88.646		406	70.667		406	47.625
407	69.273		407	62.667		407	49.111		407	119.6		407	42.333		407	49.6
408	108.386		408	109.878		408	83		408	59.5		408	68.5		408	58.317
409	92.514		409	64.286		409	57.625		409	75		409	64		409	96.524
410	95.556		410	64.778		410	57.95		410	54.154		410	67		410	96.571
411	73.818		411	63.429		411	47.667		411	55.25		411	79.167		411	79.033
412	99.548		412	98.75		412	68.909		412	57.625		412	42.2		412	44.545
413	100.125		413	58.615		413	78.4		413	63.333		413	44.667		413	46.6
414	73.833		414	61.667		414	71		414	61.643		414	42.333		414	42.533
415	114		415	70.381		415	68.5		415	59.942		415	45		415	76.2
416	164.406		416	67.125		416	69.773		416	94		416	49.062		416	56.905
417	138.777		417	66.28		417	72.333		417	61		417	50		417	56.25
418	104.75		418	71.034		418	63.4		418	62.227		418	59		418	57.188
419	114.528		419	67.143		419	82.3		419	50.333		419	74.167		419	60.625
420	121.385		420	75.917		420	72.3		420	104.2		420	46		420	69
421	114.615		421	66.857		421	49.733		421	93.576		421	41.769		421	47.3
422	87.324		422	76.312		422	47.55		422	91.5		422	68.5		422	44.4
423	74.05		423	73.788		423	55.778		423	113.073		423	46.821		423	55.69
424	76		424	65.698		424	73		424	68.562		424	105.976		424	67.176
425	101		425	64		425	81.275		425	53.714		425	58.857		425	73.273
426	75.167		426	89.5		426	51.043		426	91.292		426	52.125		426	54.185
427	106.25		427	69.667		427	60.214		427	64.947		427	78.125		427	45
428	80		428	57.273		428	58.625		428	93.915		428	101		428	46.825
429	92.951		429	82.176		429	67.742		429	62.625		429	58.167		429	48.25
430	114.814		430	103.939		430	65.812		430	68		430	71.778		430	67.5
431	98.5		431	71.812		431	50.783		431	60.017		431	47.308		431	59.667
432	98.579		432	91.949		432	66.143		432	74.586		432	49.143		432	50.143
433	90.938		433	90.63		433	93.786		433	77.437		433	44		433	41.2
434	83.962		434	66		434	80.698		434	86.057		434	45.111		434	44.4
435	112.754		435	61		435	50.824		435	73.968		435	44.4		435	50.938
436	101		436	65.933		436	64.676		436	84.739		436	60.5		436	41.923
437	86		437	57.6		437	47.538		437	55.524		437	52.778		437	57.574
438	91.3		438	95.167		438	46.722		438	76.267		438	52.5		438	55.952
439	92.771		439	90.607		439	99.41		439	64.571		439	79		439	49.688
440	66.364		440	65.5		440	58.333		440	53		440	46.844		440	91.929
441	73.091		441	69.013		441	51.25		441	53.636		441	41		441	77.909
442	96.368		442	67.462		442	52.5		442	47.2		442	42		442	74.674
443	75.652		443	89.273		443	46.167		443	66.182		443	96.375		443	59.167
444	105.638		444	60		444	70.431		444	72.45		444	52.857		444	63.677
445	157.562		445	91.727		445	57.591		445	102.438		445	52.966		445	44.538
446	102.158		446	72.452		446	75.5		446	110.86		446	42.667		446	52.5
447	98.733		447	63.2		447	67.929		447	81.205		447	56		447	44.2
448	104.944		448	84.75		448	52.08		448	82.349		448	59.312		448	46
449	135.833		449	80.438		449	65.062		449	81.118		449	69.1		449	55.385
450	84.929		450	100.269		450	60.128		450	58.467		450	70.962		450	72.062
451	103.375		451	137.312		451	52.4		451	81.095		451	52.375		451	47.2
452	72.769		452	76.25		452	47.4		452	79.642		452	41.333		452	41.5
453	121.708		453	73.125		453	49.812		453	63		453	45.667		453	57.818
454	73.786		454	58.273		454	62.812		454	66.455		454	49		454	47.167
455	82.674		455	64.5		455	52.308		455	52.091		455	53.694		455	89.02
456	138.76		456	66.75		456	71.941		456	60.5		456	55.25		456	64.978
457	149.036		457	63		457	54.692		457	58.333		457	46.25		457	63.786
458	104.963		458	56.571		458	53.25		458	75.143		458	46.5		458	46.25
459	70.889		459	74.514		459	73.018		459	102.141		459	56.875		459	43.889
460	86.321		460	90.75		460	56.667		460	91.183		460	69		460	66.125
461	161.431		461	61.786		461	56.6		461	78.312		461	56.897		461	80.369
462	84.889		462	67.842		462	59.375		462	60.936		462	42.667		462	87.358
463	102		463	64.167		463	71.511		463	89.375		463	74.556		463	47.026
464	86.625		464	99.594		464	89.667		464	59.636		464	61.562		464	40.2
465	100.692		465	57.286		465	74.8		465	73.222		465	46.3		465	63.647
466	89.371		466	57.857		466	50.636		466	84.933		466	70.889		466	68.875
467	92.938		467	66.5		467	81.968		467	85.97		467	48.571		467	99.636
468	86.667		468	61.167		468	56.474		468	78.833		468	55.286		468	41.9
469	69.846		469	96.667		469	47.25		469	52.667		469	45.52		469	60.375
470	81.062		470	54.667		470	48.857		470	70.932		470	143.188		470	49.417
471	73.143		471	88.222		471	45.286		471	96.587		471	43.667		471	66.562
472	78.692		472	65.562		472	79.469		472	60.412		472	48.455		472	122.643
473	99		473	56.875		473	105.095		473	60.333		473	49.448		473	75.072
474	99		474	58.667		474	60.889		474	70.875		474	50		474	82.111
475	193.234		475	56.667		475	68.724		475	61.815		475	57.188		475	71.054
476	110.84		476	93.667		476	51.2		476	56.8		476	50		476	47.562
477	112.375		477	60.5		477	72.795		477	55.5		477	54.25		477	54.25
478	104.389		478	76.812		478	52.923		478	85.906		478	51.708		478	41.091
479	92.688		479	92.889		479	65.5		479	85.243		479	49.333		479	42.3
480	81.5		480	91.308		480	65.66		480	93.75		480	103.556		480	71.843
481	122.522		481	82.789		481	59		481	53.769		481	48.333		481	52.947
482	109.873		482	96.778		482	75.455		482	60.774		482	77.429		482	41.909
483	72.167		483	73.077		483	53.348		483	61.214		483	44.429		483	55.4
484	79.25		484	74.062		484	90		484	74.292		484	72.75		484	50.143
485	103.083		485	61.611		485	52.81		485	63.8		485	60.632		485	52.188
486	77.231		486	71.185		486	53.214		486	100.819		486	74.154		486	67.304
487	95.625		487	82.4		487	53.15		487	51.583		487	58.75		487	49.7
488	87.895		488	93.346		488	99.993		488	70.847		488	55.625		488	60.955
489	159.623		489	66.786		489	74.375		489	63.286		489	50.75		489	54
490	69.667		490	70.927		490	50.818		490	89.119		490	49.333		490	61.448
491	107.5		491	63.375		491	67.531		491	89.346		491	63.339		491	70.753
492	73.667		492	95.808		492	57.5		492	86.062		492	52.875		492	67.438
493	113.125		493	56.667		493	75.673		493	76.667		493	44		493	68.519
494	116.97		494	63.167		494	59.577		494	53.333		494	105.344		494	48
495	69.667		495	105.167		495	78.606		495	65.875		495	81.815		495	51.077
496	72.923		496	76		496	57.167		496	79.75		496	44		496	44.303
497	108.273		497	59.857		497	63		497	70		497	55.429		497	65.643
498	97.205		498	96.531		498	57.828		498	76.75		498	47.923		498	68.593
499	90.13		499	78.55		499	84.333		499	82.917		499	51.333		499	50.667
500	91.041		500	64.481		500	90		500	76.25		500	40.733		500	44.615
501	103.61		501	67.419		501	72.379		501	63.625		501	84.719		501	42.812
502	91.75		502	68.032		502	87.76		502	83.056		502	54.375		502	60.913
503	81.481		503	69.154		503	56		503	82.111		503	52.513		503	76.679
504	72.143		504	108.938		504	51.8		504	56.333		504	56.762		504	61.171
505	84.706		505	99.625		505	54.389		505	66.5		505	61.433		505	71.571
506	67.118		506	74.654		506	84.327		506	66.625		506	107.019		506	53.02
507	68.333		507	62.143		507	51.333		507	69.5		507	44.312		507	54.188
508	100.115		508	154.719		508	79.284		508	61.875		508	77.857		508	55.286
509	70.636		509	73.889		509	55.72		509	57.071		509	60.708		509	58.68
510	91.344		510	90.25		510	68.548		510	56.667		510	41		510	43.667
511	103.15		511	77.062		511	90.435		511	67.806		511	66.75		511	63.85
512	76.409		512	93.52		512	99.722		512	78.778		512	67.212		512	63.444
513	130.659		513	66.769		513	63.5		513	101.656		513	53.625		513	51.286
514	108.903		514	71		514	74.094		514	107.689		514	72.125		514	67.387
515	115.289		515	66.308		515	89.289		515	72.375		515	46.5		515	44.9
516	99.848		516	89.375		516	96.458		516	80.167		516	63.9		516	68.207
517	82.05		517	67.37		517	53.923		517	55.731		517	87.167		517	62.821
518	129.515		518	89.2		518	53.045		518	78.875		518	58.905		518	94.5
519	92.938		519	100		519	51		519	81.346		519	60.935		519	64.111
520	94.067		520	66.938		520	51.333		520	117.071		520	57.684		520	46.6
521	91.212		521	76.812		521	61.574		521	58.556		521	72.049		521	64.562
522	116.25		522	60.429		522	67.438		522	80.222		522	49.483		522	96.569
523	86.679		523	94.406		523	59.385		523	82.423		523	43.8		523	66.438
524	135.605		524	57.833		524	77.16		524	54.25		524	55.098		524	45.909
525	142.753		525	62.308		525	54.755		525	86.269		525	72.881		525	45.19
526	72.174		526	82.038		526	69		526	69.618		526	46.706		526	61.286
527	102.222		527	59.4		527	66.708		527	61.333		527	43.667		527	67.545
528	117.633		528	59.222		528	53.429		528	114.705		528	66.868		528	64.556
529	179.125		529	68.167		529	75.63		529	76.536		529	62.733		529	72.81
530	120.752		530	120.844		530	45.4		530	81.925		530	45.4		530	42.5
531	80.071		531	62.36		531	57.567		531	77.264		531	42.429		531	50.508
532	110.288		532	58.222		532	71.238		532	100.221		532	66		532	48.385
533	75.375		533	95.5		533	76.327		533	94.136		533	44.167		533	72.704
534	85.205		534	94.436		534	67.086		534	60.031		534	44.368		534	44.6
535	120.752		535	62.231		535	46.286		535	67.932		535	41.857		535	49.25
536	70.45		536	71		536	68.816		536	77.929		536	57.45		536	71.355
537	112.151		537	99.914		537	76.536		537	85.462		537	54		537	48.706
538	111.765		538	64.923		538	53.615		538	87.219		538	42.412		538	53.591
539	97.056		539	74.5		539	55.381		539	49		539	54.379		539	46.733
540	95.061		540	55.818		540	64.824		540	62.333		540	67		540	42.6
541	73.333		541	124.906		541	52.875		541	117.73		541	53.5		541	56.01
542	74		542	77		542	51.458		542	74.62		542	51.5		542	65.614
543	79		543	60		543	55.688		543	58.231		543	51.077		543	61.625
544	107.577		544	61.417		544	48		544	82.875		544	71.875		544	85.943
545	129.809		545	100.154		545	59.95		545	71.583		545	55.171		545	57.026
546	93.103		546	89.667		546	59.75		546	128.075		546	52		546	68.848
547	110.834		547	78.667		547	54.857		547	83.382		547	43.667		547	46.154
548	74.824		548	65.143		548	66.179		548	75.364		548	41.833		548	72.95
549	94.885		549	77.077		549	52.167		549	61.636		549	71.367		549	49.25
550	140		550	70.125		550	57.25		550	58		550	52		550	62.688
551	72.5		551	80.792		551	78.72		551	65.625		551	52.75		551	63.688
552	117.812		552	57.385		552	70.389		552	63.75		552	59.4		552	40.6
553	147.832		553	67.643		553	58.81		553	62.538		553	97.164		553	54.619
554	102.889		554	61.04		554	45.545		554	60.214		554	48.75		554	75.238
555	98.442		555	130.368		555	62.9		555	52.333		555	71.412		555	62.276
556	89.111		556	59.417		556	80.371		556	55.385		556	67.222		556	63.767
557	76.538		557	94.781		557	49.9		557	108.832		557	55.857		557	109.409
558	95.312		558	72		558	61.562		558	79.727		558	64.146		558	44.143
559	108.857		559	69		559	75.111		559	51.318		559	58.357		559	47.118
560	103.75		560	68.643		560	47.667		560	68.625		560	54.417		560	51.609
561	80.125		561	92.447		561	52.938		561	60.143		561	43.667		561	44.2
562	82.889		562	90.214		562	51.333		562	56.543		562	53.323		562	88.378
563	92.513		563	63		563	46.4		563	64.576		563	66.754		563	46.6
564	71.176		564	81.75		564	68.812		564	81.259		564	50.944		564	68.111
565	116.5		565	64.5		565	74.278		565	71.688		565	156.985		565	63.625
566	106.587		566	56		566	56.812		566	90.828		566	49.188		566	49
567	154.723		567	69.946		567	85.905		567	75.101		567	68.588		567	66.364
568	65.333		568	130.91		568	54.8		568	63.562		568	64.907		568	42.2
569	74.667		569	67.375		569	58.178		569	54.167		569	68.294		569	43.25
570	109.822		570	84.531		570	70.1		570	50.727		570	81.438		570	75.417
571	154.728		571	57.941		571	47.6		571	58.5		571	67.184		571	73.467
572	76.067		572	106.022		572	46.091		572	80.645		572	44.312		572	63.412
573	101.024		573	75.263		573	73.116		573	58.176		573	56.188		573	61
574	75.543		574	64.923		574	52.769		574	65.704		574	130.75		574	53
575	82.8		575	87.102		575	60.125		575	79.833		575	67.971		575	47.6
576	111.3		576	56.833		576	44.6		576	74.571		576	89.2		576	49.875
577	86.2		577	66.452		577	53.667		577	65.25		577	43.077		577	72.12
578	79.769		578	68.349		578	45.333		578	75.5		578	51		578	72.417
579	65.333		579	102.5		579	46.545		579	60.238		579	59.688		579	93.442
580	111.474		580	88.667		580	76.083		580	66.259		580	93.575		580	82.154
581	91.833		581	64.938		581	59.875		581	59.667		581	58.333		581	62.294
582	96.775		582	74.762		582	74.556		582	81.256		582	53		582	52.045
583	115.238		583	88.591		583	74.724		583	85.5		583	45.545		583	54.793
584	115.754		584	80.156		584	49.455		584	70.625		584	107.048		584	55.846
585	78.111		585	65.806		585	47		585	88.491		585	67.676		585	45.778
586	105.75		586	84.548		586	63.562		586	53.364		586	57.881		586	71.171
587	80.406		587	88.425		587	67.074		587	94.468		587	42.25		587	54.091
588	145.349		588	94.5		588	55		588	61		588	46.75		588	57.75
589	103.5		589	95.125					589	83		589	71.656		589	47.778
590	81.375		590	64.122					590	77.058		590	47.5		590	46.5
591	101.682		591	66.667					591	55.333		591	49.875		591	88.836
592	71.231		592	85.65					592	55.231		592	44		592	63.147
593	137.207		593	116.625					593	58.125		593	72.667		593	65.944
594	108.788		594	67.667					594	91.825		594	49.72		594	45.375
595	80.31		595	56.5					595	58.391		595	44.846		595	49.125
596	87.25		596	90.955					596	92.196		596	47.571		596	47.714
597	69.643		597	74.179					597	52.333		597	44		597	65.25
598	105.667		598	61.077					598	58.923		598	54.444		598	71.556
599	124.528		599	61					599	52.286		599	51		599	41.364
600	118.37		600	75.421					600	61.062		600	65		600	45.857
601	117.652		601	58					601	84.25		601	61.5		601	63.76
602	96.977		602	66.214					602	76.583		602	50.625		602	48.65
603	72.077		603	83.375					603	87.062		603	47.724		603	50.596
604	81.421		604	68.538					604	72.812		604	50.143		604	49.333
605	81.556		605	59.25					605	59.143		605	48.333		605	67.067
606	72.75		606	65.625					606	52.75		606	76.643		606	43.1
607	78.786		607	54.1					607	71.889		607	57.938		607	42.231
608	88.421		608	72.684					608	62.5		608	46.067		608	41.2
609	96.833		609	73.792					609	52		609	41.571		609	73.171
610	69.667		610	69.353					610	134.922		610	49.667		610	72.2
611	71		611	65					611	54.667		611	74.028		611	77.392
612	83.333		612	82.333					612	86.316		612	76.938		612	70.375
613	79.5		613	55.5					613	63.75		613	42.667		613	49.849
614	98.696		614	124.825					614	80.133		614	42.333		614	60.542
615	69.235		615	59.071					615	78.641		615	52.885		615	66.302
616	121.341		616	94.9					616	63.25		616	50.75		616	43
617	71.2		617	76.875					617	65.667		617	43.3		617	49.5
618	72.857		618	91.267					618	73.375		618	76.963		618	57.491
619	116.509		619	57.833								619	73.5		619	67.917
620	89.733		620	69								620	64.255		620	89.344
621	75.857		621	62.292								621	60.688		621	45.375
622	138.579		622	54.923								622	66.5		622	65.083
623	127.645		623	89.25								623	71.167		623	50.875
624	152.71		624	74.438								624	59.017		624	73.167
625	106.458		625	69.842								625	56.577		625	62.81
626	94.3		626	68.892								626	52.5		626	44.375
627	94.75		627	86.75								627	68.938		627	46.857
628	117.29		628	73.435								628	74.588		628	47.56
629	100.85		629	68.357								629	73.25		629	59.25
630	82		630	79.5								630	50.333		630	57.938
631	76		631	80.444								631	52.5		631	68.043
632	89.087		632	99.333								632	45.286		632	68.056
633	79.429		633	89.25								633	74.161		633	50.75
634	100.889		634	69.188								634	40.75		634	49.182
635	84.464		635	59								635	116		635	55.043
636	80.774		636	88.667								636	77.629		636	55
637	88.368		637	68								637	83.969		637	62.312
638	109.537		638	69								638	56		638	70.833
639	131.493		639	59.667								639	51.875		639	44.6
640	92.566		640	67.833								640	55.786		640	55.75
641	133.875		641	73								641	52.5		641	42.286
642	79.76		642	99.467								642	62.45		642	49.938
643	74.833		643	92.229								643	48		643	44.167
644	120.188		644	75.167								644	79.969		644	47.714
645	89.107		645	67.071								645	75.833		645	50.867
646	88.105		646	84.746								646	83.174		646	43.485
647	112.65		647	83.75								647	64.375		647	51.833
648	115.077		648	105.353								648	44.846		648	79.647
649	112.711		649	86.033								649	46.429		649	84.9
650	101.849		650	73.129								650	42.3		650	49.5
651	152.156		651	61								651	50.667		651	59.24
652	118.02		652	62.6								652	63.173		652	46.6
653	77.667		653	59								653	53.696		653	56.5
654	75.333		654	71.75								654	43.923		654	68.5
655	97.375		655	103.593								655	42.667		655	55.25
656	73.5		656	77.105								656	48.333		656	56.875
657	74.75		657	89.222								657	42.333		657	47.4
658	177.175		658	95.167								658	78.5		658	47.143
659	101.48		659	83								659	46.333		659	42.6
660	161.775		660	60.071								660	64		660	54
661	103.776		661	83.229								661	56.12		661	58.188
662	155.047		662	61.636								662	51.316		662	67.154
663	84.438		663	90.087								663	73.149		663	57.381
664	101.75		664	98.4								664	78.969		664	56.583
665	111.111		665	76.667								665	46		665	45.676
666	73.048		666	64.462								666	70.453		666	49.812
667	141.373		667	70.714								667	84.439		667	46.182
668	110.414		668	55								668	85.25		668	45.6
669	89.705		669	81.75								669	64.75		669	44.471
670	73.615		670	60.385								670	73.207		670	49.966
671	141.906		671	70.222								671	64.571		671	62.412
672	104.174		672	72.027								672	46.625		672	42.4
673	80.214		673	63.643								673	40.25		673	53.228
674	89.9		674	67.842								674	85		674	65.8
675	119.833		675	106.902								675	72.127		675	95.062
676	68.833		676	86								676	53.188		676	60.074
677	68.3		677	83.879								677	59.564		677	63.357
678	134.703		678	79.091								678	71.269		678	55.949
679	121.484		679	61.5								679	70.11		679	45.579
680	107.865		680	59.133								680	44.667		680	67.288
681	129.562		681	69.25								681	48.308		681	57
682	116.115		682	97.538								682	59.3		682	67.5
683	86.737		683	85.062								683	68.562		683	44.938
684	72.167		684	75.138								684	139.161		684	49.821
685	116.812		685	84.25								685	117.647		685	54.894
686	95.611		686	60.357								686	82.242		686	67.656
687	82.5		687	58								687	55.75		687	77.676
688	75		688	92.2								688	47.333		688	70.74
689	79.659		689	55.462								689	59.333		689	53.25
690	100.389		690	93.107								690	51.474		690	57.143
691	82.053		691	110.104								691	42		691	90.421
692	145.83		692	109.878								692	66.75		692	48
693	76.667		693	79.322								693	42.333		693	50.571
694	79		694	110.381								694	46.75		694	51.467
695	125.845		695	67.385								695	61.875		695	61.55
696	94.742		696	81.642								696	68.833		696	53.688
697	127.344		697	110.132								697	45.385		697	83.99
698	91		698	59.429								698	47.4		698	47
699	100.444		699	88.246								699	48.615		699	44.6
700	109.171		700	63.537								700	52.625		700	65.568
701	137.375		701	79.389								701	54.125		701	63.864
702	100.879		702	89.174								702	51		702	64.618
703	79.917		703	92.061								703	48.889		703	68.2
704	96.333		704	62.308								704	51.625		704	72.4
705	104.686		705	88.133								705	45.167		705	65.95
706	140.281		706	69.125								706	44.333		706	46.125
707	70.833		707	72.846								707	68.488		707	67.618
708	85.75		708	104.385								708	52.5		708	48.154
709	73.611		709	95.938								709	46.077		709	46.588
710	94.25		710	89.358								710	51.658		710	53.519
711	89.833		711	67								711	56.19		711	55.357
712	105.849		712	76.5								712	52.429		712	42.2
713	86.417		713	82.821								713	62.636		713	44.455
714	68.154		714	126.026								714	41.118		714	50.097
715	80.5		715	102.707								715	83.53		715	62.865
716	71		716	59.3								716	64.45		716	45.091
717	108.734		717	58								717	48.25		717	66.412
718	126.644		718	66.413								718	46.353		718	70.188
719	68.5		719	85.188								719	77.062		719	62.379
720	157.86		720	58								720	69.5		720	62.577
721	99.2		721	66.667								721	76.75		721	64.905
722	135.007		722	54.636								722	54.75		722	45.2
723	83.882		723	94.583								723	76.793		723	45
724	67.333		724	99.973								724	101.802		724	54.444
725	102.092		725	58.692								725	45.143		725	76.333
726	74.667		726	66.857								726	73.5		726	42.5
727	80.222		727	63.333								727	69.5		727	81.5
728	93.636		728	80.771								728	104.608		728	65
729	86.727		729	95.562								729	73.157		729	58.857
730	70		730	56								730	51.188		730	163.63
731	85		731	63.907								731	62.562		731	91.217
732	74		732	65.75								732	42.333		732	58.021
733	102.586		733	86.881								733	64.837		733	52.5
734	104.781		734	87.25								734	60.125		734	68.375
735	105.4		735	61								735	51.188		735	58
736	121.118		736	136.438								736	43		736	54.714
737	82		737	93.028								737	43.297		737	72.278
738	77.923		738	101.875								738	49.667		738	52.2
739	95		739	169.139								739	41.667		739	46.417
740	83.167		740	109.706								740	49.375		740	50
741	69.273		741	76.2								741	61.5
742	100.75		742	67.588								742	70.471
743	79		743	61.267								743	76.5
744	107.108		744	66.625								744	81.562
745	73.833		745	59.333								745	64.5
746	76.154		746	91.95								746	62.167
747	97.188		747	54.833								747	51.346
748	82		748	88								748	48.667
749	77.706		749	98.938								749	50.333
750	86.111		750	71.426								750	68.857
751	88.278		751	118.28								751	65.625
752	83.562		752	113.865								752	50.333
753	85.667		753	63								753	56.444
754	79.733		754	101.224								754	66.562
755	87.735		755	86.143								755	67.778
756	133.149		756	64.6								756	50.333
757	72.083		757	67.062								757	44
758	81.75		758	60.231								758	50.35
759	106.333		759	68.062								759	61.667
760	115.444		760	107.797
761	107.654		761	131.091
762	80.217		762	58
763	89.875		763	137.26
764	81.957		764	101.692
765	82.562		765	79.062
766	71.2		766	58.538
767	80.625		767	65.475
768	79.875		768	92.028
769	68.167		769	66
770	75.682		770	78.25
771	71.273		771	82.5
772	103.206		772	83.685
773	142.69		773	57.333
774	70.333		774	95.25
775	74.615		775	101.538
776	74.571		776	92.078
777	69		777	85.087
778	91.514		778	68.5
779	69.4		779	69.25
780	87.549		780	74.312
781	138.273		781	89.548
782	69.385		782	69.615
783	105.312		783	59.429
784	94.053		784	115.312
785	68.389		785	93.771
786	88.683		786	54.667
787	139.775		787	65.333
788	80.553		788	62.625
789	74.545		789	55
790	79.1		790	78.509
791	108.308		791	113.969
792	107.037		792	94
793	68.75		793	92.9
794	70.333		794	68.235
795	79.706		795	67.062
796	113.429		796	84.024
797	67.077		797	82.909
798	86.812		798	66
799	89.379		799	108.495
800	84.978		800	67.6
801	95.148		801	62.071
802	65.857		802	89
803	118.778		803	89.727
804	71.385		804	99.953
805	65.833		805	76.812
806	119.667		806	71.583
807	74.667		807	65.909
808	89.654		808	71.29
809	108.4		809	70.821
810	69.143		810	58.167
811	70.684		811	60.286
812	114.917		812	87.031
813	181.82		813	94.922
814	98.444		814	68.677
815	87.25		815	85.727
816	86.125		816	78.75
817	91.427		817	97.778
818	80.078		818	58.6
819	140.951		819	64.118
820	79.682		820	60.077
821	67.833		821	88.645
822	84.25		822	95.375
823	70		823	86.92
824	110.902		824	72.562
825	74.708		825	60
826	82.053		826	69.714
827	84.29		827	58.286
828	80.328		828	85.884
829	74		829	69.875
830	135.243		830	83.177
831	75.625		831	123.559
832	68.364		832	96.75
833	70.182		833	88.488
834	99.644		834	65.75
835	69.667		835	63.773
836	77.475		836	65.923
837	129.92		837	55.333
838	99.143		838	69.125
839	95.5		839	96.75
840	81.588		840	56.833
841	76.905		841	72.062
842	68.833		842	58
843	75.083		843	71.444
844	99.477		844	62.136
845	99.143		845	112.625
846	120.237		846	104.068
847	97.188		847	63.333
848	68.615		848	125.062
849	83.375		849	87.615
850	129.909		850	60.429
851	143.843		851	60.333
852	102.756		852	73.579
853	127.908		853	62.333
854	86.812		854	64.75
855	70.294		855	73
856	95.13		856	61.619
857	74.29		857	58.947
858	76.875		858	98.542
859	145.567		859	102.219
860	80.37		860	65.75
861	71.765		861	89
862	87.625		862	63.333
863	100.55		863	57.2
864	91		864	58.833
865	65.333		865	73.562
866	196.324		866	62.333
867	82.733		867	75.75
868	89.429		868	55.8
			869	60.538
			870	56.667
			871	69.545
			872	57
			873	76.062
			874	58
			875	61.562
			876	62.462
			877	131.714
			878	109.5
			879	79.25
			880	65.083

## Sheet: Fig.2B(P9)
P9
	Ctrl	MMF
	22	23
	28	19
	24	22
	22	23
	23	29
	27	25

## Sheet: Fig.2D(P14)
P14
	Ctrl	MMF
	30	29
	43	26
	30	30
	39	27
	26	34
	26	31

## Sheet: Fig.3E and 3F  Cell diameter
Ctrl		BV2_1	BV2_2	BV2_3	BV2_4	BV2_5	BV2_6	BV2_7	BV2_8	BV2_9	BV2_10	BV2_11	BV2_12	BV2_13	BV2_14	BV2_15	BV2_16	BV2_17	BV2_18	BV2_19	BV2_20	BV2_21	BV2_22	BV2_23	BV2_24	BV2_25	BV2_26	BV2_27	BV2_28	BV2_29	BV2_30
	0	22.7867	61.0632	110.733	91.5308	26.4991	44.1652	73.2247	25.091	71.1764	46.9816	20.3544	62.2154	63.2395	92.0429	109.837	45.3174	24.963	50.694	78.0892	22.4027	23.4268	117.646	18.9462	21.3785	18.1782	35.2042	47.3656	33.924	81.8017	31.8758
	15	38.9166	70.1523	66.0558	110.989	32.5158	42.373	81.5457	25.8591	42.501	54.5345	29.0594	66.5679	73.7367	96.7795	65.9278	30.2116	25.8591	37.2524	68.1041	36.2283	23.8108	99.7238	27.0112	26.7552	18.1782	42.629	53.5103	56.3267	50.694	43.3971
	30	31.1077	27.5233	98.5717	61.3193	51.3341	46.2135	74.3768	24.8349	34.8201	39.9407	71.4325	80.9056	26.2431	74.8889	94.6032	42.117	29.8275	45.5734	44.9333	27.6513	22.9147	75.913	28.6754	22.2746	19.8423	55.6866	76.5531	39.4287	78.0892	51.7181
	45	51.9742	25.475	105.997	75.5289	66.0558	51.9742	77.4492	51.4621	50.31	63.3675	85.5141	64.1356	27.9073	77.1931	105.869	42.8851	26.8832	68.8722	56.5827	21.8906	23.5548	45.9574	22.6587	22.2746	17.9221	98.0596	38.1485	29.4435	101.772	48.9018
	60	63.7515	39.1726	37.7645	49.7979	42.373	44.4213	83.9779	87.1783	70.2803	69.5122	90.8908	90.3787	36.4843	68.1041	43.2691	42.7571	23.2988	49.0298	52.1022	18.8182	19.3303	44.1652	24.0668	20.7385	40.8368	58.759	55.4306	42.629	26.4991	40.1968
	75	71.4325	38.6606	57.6068	46.9816	42.8851	36.7403	90.6347	116.622	50.694	51.5901	105.613	51.2061	41.6049	50.0539	66.9519	44.0372	25.8591	53.5103	68.7441	19.9704	22.5307	40.1968	19.8423	25.475	31.6197	92.0429	65.9278	30.9797	24.7069	33.668
	90	60.8072	29.5715	61.1912	24.7069	57.2228	31.2357	99.0837	116.622	88.0744	70.6644	120.206	77.5772	34.052	26.2431	62.7274	46.5975	49.2858	43.5252	76.9371	17.7941	18.6902	30.9797	25.9871	25.347	52.8703	120.846	66.5679	63.4955	18.8182	39.6847
	105	33.924	25.347	60.8072	29.5715	71.8165	32.1318	97.6756	63.2395	56.7107	79.1134	62.3434	66.3118	27.2672	25.347	60.8072	21.1225	26.1151	25.091	73.0967	19.9704	21.6346	19.5863	31.1077	23.6828	21.2505	113.421	68.6161	48.6458	25.475	38.7886
	120	61.3193	52.7422	107.661	55.4306	113.677	52.9983	106.509	28.1633	54.4064	70.6644	29.8275	58.6309	53.3823	57.2228	112.141	30.4676	16.1299	24.1949	81.9297	19.7143	26.1151	19.4583	25.219	30.0836	30.8517	74.8889	48.2617	28.1633	22.0186	27.1392
	135	55.6866	58.1189	127.631	60.1671	132.112	26.4991	92.2989	24.8349	70.1523	39.5567	23.9388	89.3546	31.2357	60.9352	129.807	26.6272	14.9778	17.9221	74.7608	18.8182	27.0112	21.3785	37.8925	26.8832	40.5808	97.1635	73.0967	30.9797	19.4583	23.4268	(min)
	(min)
MMF		BV2_1	BV2_2	BV2_3	BV2_4	BV2_5	BV2_6	BV2_7	BV2_8	BV2_9	BV2_10	BV2_11	BV2_12	BV2_13	BV2_14	BV2_15	BV2_16	BV2_17	BV2_18	BV2_19	BV2_20	BV2_21	BV2_22	BV2_23	BV2_24	BV2_25	BV2_26	BV2_27	BV2_28	BV2_29	BV2_30
	0	27.1392	28.9314	38.9166	26.4991	24.963	24.8349	28.1633	31.6197	28.8034	33.0279	48.5177	24.1949	72.5846	75.2729	62.7274	45.4454	71.9445	28.4194	39.6847	25.9871	67.976	22.2746	26.6272	24.1949	73.4807	56.1987	42.629	35.2042	24.5789	63.7515
	15	40.7088	22.9147	21.2505	19.9704	35.5882	27.9073	26.6272	65.0317	31.6197	23.5548	37.6365	25.475	79.2414	88.7145	69.6402	28.6754	87.8184	38.6606	31.1077	27.2672	35.7162	29.4435	28.9314	24.963	73.3527	77.4492	38.7886	27.7793	37.6365	81.2896
	30	31.4917	23.4268	43.5252	18.8182	22.1466	21.3785	23.6828	109.325	37.8925	22.9147	28.9314	19.8423	73.0967	67.0799	67.208	28.0353	100.62	23.9388	37.5084	22.2746	34.5641	17.6661	30.7236	21.6346	20.3544	88.0744	45.0613	23.9388	20.8665	56.0706
	45	37.8925	21.1225	25.9871	20.8665	20.8665	22.5307	20.9945	87.9464	35.0762	26.4991	41.6049	19.9704	71.4325	64.3916	58.2469	35.8442	71.0484	24.3229	31.6197	20.7385	29.8275	19.4583	21.2505	28.9314	17.9221	87.0503	49.4138	23.4268	29.3155	75.657
	60	35.4602	20.9945	23.6828	19.5863	21.6346	23.4268	25.731	55.8146	34.6921	21.3785	25.347	19.7143	67.976	67.72	28.5474	36.6123	52.2302	23.9388	22.2746	38.0205	27.5233	19.3303	25.347	25.8591	18.5622	85.0021	43.9092	24.4509	25.091	78.0892
	75	26.1151	19.7143	23.0427	18.6902	17.282	20.8665	37.7645	47.6216	25.603	20.3544	18.4342	18.8182	69.1282	64.9037	22.4027	26.2431	36.7403	22.2746	23.9388	21.7626	32.0038	18.4342	19.8423	21.7626	22.0186	68.8722	38.5326	18.8182	20.2264	58.2469
	90	22.4027	20.9945	19.5863	20.2264	19.4583	21.5065	32.8999	73.6087	30.9797	32.1318	23.8108	17.9221	68.1041	66.0558	24.7069	28.4194	25.9871	23.0427	23.2988	24.8349	52.2302	17.9221	22.0186	22.0186	30.3396	65.6718	32.0038	21.1225	20.6104	62.3434
	105	16.642	22.0186	24.1949	21.1225	17.7941	24.0668	27.6513	91.0188	21.5065	22.1466	31.7478	17.9221	73.6087	67.848	25.9871	24.4509	20.4824	22.9147	23.6828	20.6104	64.5196	21.7626	20.7385	33.0279	21.7626	58.2469	31.8758	23.4268	32.7719	68.4881
	120	17.026	23.4268	25.091	26.4991	17.9221	21.2505	36.7403	78.0892	38.6606	23.9388	18.1782	18.1782	71.0484	68.1041	34.052	38.1485	29.0594	22.9147	22.5307	43.0131	76.9371	19.3303	21.5065	35.5882	28.5474	64.9037	31.1077	21.8906	36.9964	75.2729
	135	66.0558	25.9871	44.2932	26.6272	19.0743	20.3544	50.95	71.1764	32.2598	30.9797	21.7626	18.4342	73.4807	70.6644	47.6216	24.7069	22.1466	22.9147	23.4268	72.4566	85.5141	18.1782	24.5789	33.668	26.8832	80.1375	23.1707	26.7552	34.052	48.7738	(min)
	(min)

## Sheet: Fig.3G and 3H Area
Ctrl		BV2_1	BV2_2	BV2_3	BV2_4	BV2_5	BV2_6	BV2_7	BV2_8	BV2_9	BV2_10	BV2_11	BV2_12	BV2_13	BV2_14	BV2_15	BV2_16	BV2_17	BV2_18	BV2_19	BV2_20	BV2_21	BV2_22	BV2_23	BV2_24	BV2_25	BV2_26	BV2_27	BV2_28	BV2_29	BV2_30
	0	266.479	383.064	1015.95	582.923	349.754	549.613	799.437	266.479	632.888	482.993	233.169	516.303	466.339	482.993	582.923	433.029	449.684	499.648	566.268	316.444	316.444	749.473	216.514	283.134	199.859	599.578	766.128	449.684	632.888	466.339
	15	449.684	499.648	616.233	732.818	482.993	449.684	882.712	366.409	499.648	433.029	299.789	632.888	566.268	649.543	499.648	349.754	416.374	399.719	566.268	549.613	316.444	716.163	383.064	333.099	183.204	799.437	982.642	582.923	799.437	532.958
	30	516.303	383.064	916.022	532.958	682.853	532.958	932.677	333.099	632.888	349.754	349.754	766.128	349.754	582.923	666.198	482.993	466.339	632.888	433.029	316.444	316.444	799.437	366.409	316.444	216.514	1199.16	1115.88	582.923	666.198	566.268
	45	649.543	316.444	782.783	399.719	516.303	599.578	849.402	499.648	482.993	333.099	616.233	766.128	349.754	399.719	882.712	466.339	433.029	699.508	582.923	283.134	349.754	549.613	299.789	316.444	199.859	1182.5	849.402	416.374	982.642	616.233
	60	716.163	416.374	499.648	316.444	532.958	516.303	816.092	749.473	682.853	532.958	482.993	732.818	416.374	416.374	449.684	482.993	333.099	799.437	566.268	233.169	266.479	449.684	266.479	216.514	449.684	1199.16	866.057	599.578	416.374	616.233
	75	932.677	499.648	399.719	416.374	516.303	433.029	1032.61	682.853	482.993	499.648	649.543	466.339	516.303	449.684	449.684	349.754	383.064	616.233	566.268	233.169	333.099	366.409	266.479	283.134	466.339	1099.23	1099.23	366.409	433.029	549.613
	90	549.613	433.029	449.684	333.099	1015.95	383.064	1082.57	949.332	482.993	582.923	566.268	699.508	433.029	399.719	649.543	399.719	516.303	582.923	649.543	199.859	199.859	449.684	216.514	299.789	482.993	1265.78	832.747	749.473	216.514	632.888
	105	616.233	299.789	566.268	199.859	1099.23	482.993	649.543	499.648	549.613	632.888	416.374	749.473	333.099	349.754	566.268	266.479	433.029	449.684	566.268	266.479	266.479	233.169	333.099	249.824	266.479	1432.33	932.677	799.437	283.134	616.233
	120	549.613	466.339	932.677	299.789	999.297	549.613	1049.26	266.479	649.543	699.508	333.099	816.092	516.303	366.409	916.022	466.339	166.549	399.719	716.163	233.169	399.719	249.824	333.099	466.339	399.719	1299.09	766.128	449.684	249.824	466.339
	135	599.578	532.958	816.092	399.719	1099.23	383.064	1032.61	233.169	582.923	416.374	266.479	965.987	349.754	333.099	949.332	399.719	149.895	183.204	616.233	233.169	433.029	316.444	399.719	383.064	349.754	1365.71	849.402	449.684	233.169	399.719	(µm^2)
	(min)
MMF		BV2_1	BV2_2	BV2_3	BV2_4	BV2_5	BV2_6	BV2_7	BV2_8	BV2_9	BV2_10	BV2_11	BV2_12	BV2_13	BV2_14	BV2_15	BV2_16	BV2_17	BV2_18	BV2_19	BV2_20	BV2_21	BV2_22	BV2_23	BV2_24	BV2_25	BV2_26	BV2_27	BV2_28	BV2_29	BV2_30
	0	366.409	283.134	333.099	233.169	249.824	333.099	283.134	449.684	266.479	416.374	482.993	333.099	566.268	366.409	1065.92	349.754	616.233	516.303	532.958	449.684	516.303	249.824	399.719	316.444	299.789	532.958	516.303	532.958	349.754	666.198
	15	433.029	299.789	266.479	249.824	299.789	366.409	249.824	666.198	283.134	283.134	349.754	283.134	649.543	482.993	1032.61	349.754	649.543	416.374	499.648	449.684	366.409	316.444	416.374	333.099	283.134	616.233	449.684	383.064	549.613	849.402
	30	399.719	299.789	383.064	216.514	233.169	316.444	266.479	832.747	299.789	299.789	316.444	249.824	549.613	449.684	799.437	349.754	1032.61	383.064	433.029	333.099	349.754	216.514	333.099	299.789	199.859	616.233	516.303	349.754	283.134	816.092
	45	333.099	266.479	266.479	233.169	216.514	316.444	216.514	699.508	366.409	333.099	349.754	266.479	582.923	433.029	682.853	482.993	899.367	399.719	416.374	266.479	333.099	249.824	266.479	283.134	166.549	816.092	482.993	349.754	266.479	716.163
	60	333.099	249.824	299.789	216.514	199.859	316.444	266.479	666.198	333.099	299.789	233.169	249.824	482.993	383.064	516.303	349.754	632.888	383.064	316.444	449.684	283.134	233.169	299.789	283.134	216.514	649.543	433.029	383.064	299.789	766.128
	75	299.789	233.169	283.134	233.169	183.204	316.444	349.754	566.268	266.479	283.134	216.514	249.824	466.339	383.064	316.444	333.099	399.719	316.444	349.754	299.789	416.374	233.169	283.134	266.479	266.479	832.747	466.339	216.514	249.824	482.993
	90	333.099	249.824	266.479	216.514	199.859	266.479	316.444	649.543	366.409	316.444	216.514	216.514	416.374	449.684	333.099	283.134	366.409	299.789	383.064	366.409	383.064	216.514	333.099	299.789	366.409	649.543	433.029	316.444	266.479	416.374
	105	183.204	233.169	266.479	233.169	199.859	316.444	299.789	682.853	266.479	316.444	349.754	216.514	549.613	449.684	333.099	283.134	266.479	316.444	366.409	283.134	482.993	266.479	299.789	416.374	283.134	566.268	416.374	283.134	499.648	699.508
	120	183.204	266.479	283.134	266.479	199.859	299.789	349.754	666.198	316.444	333.099	233.169	216.514	466.339	433.029	516.303	333.099	416.374	349.754	349.754	532.958	549.613	233.169	316.444	383.064	233.169	649.543	433.029	299.789	532.958	699.508
	135	782.783	283.134	349.754	283.134	199.859	283.134	399.719	782.783	333.099	399.719	283.134	233.169	582.923	449.684	449.684	283.134	349.754	349.754	316.444	649.543	766.128	199.859	349.754	349.754	299.789	599.578	316.444	349.754	466.339	349.754	(µm^2)
	(min)

## Sheet: Fig.4D
Ctrl						MMF
	Number of microglia/field	Rac1 cluster positive cells	Rac1 cluster negative cells	Rac1 cluster negative cells			Number of microglia/field	Rac1 cluster positive cells	Rac1 cluster negative cells	Rac1 cluster negative cells
Field1	4	1	3	25		Field1	2	0	2	0
Field2	4	1	3	25		Field2	4	2	2	50
Field3	2	2	0	100		Field3	2	0	2	0
Field4	4	3	1	75		Field4	2	0	2	0
Field5	2	1	1	50		Field5	3	1	2	33.3333
Field6	4	1	3	25		Field6	2	2	0	100
Field7	2	2	0	100		Field7	3	0	3	0
Field8	2	1	1	50		Field8	2	0	2	0
Field9	3	3	0	100		Field9	4	0	4	0
Field10	4	2	2	50		Field10	2	0	2	0
Field11	3	1	2	33.3333		Field11	4	0	4	0
Field12	2	0	2	0		Field12	3	0	3	0
Total	36	18	18			Field13	2	0	2	0
						Field14	3	0	3	0
						Total	38	5	33

## Sheet: Fig.4F
	Ctrl						MMF				Total
		Origin of the process	Branching poont	Cell body	Total			Origin of the process	Branching poont	Cell body
	Number of Rac1 location	13	3	6	22		Number of Rac1 location	4	1	2	7
	Ratio[%]	59.0909	13.6364	27.2727			Ratio[%]	57.1429	14.2857	28.5714

## Sheet: Fig.5B and 5C
Skeltonize(# of process)	mouse ID	Ctrl	mouse	MMF		Manual(# of process)	mouse ID	Ctrl	mouse	MMF
	1	82	4	41			1	64	4	54
	1	42	4	78			1	41	4	32
	1	95	4	24			1	53	4	19
	1	62	4	50			1	50	4	37
	1	47	4	59			1	40	4	38
	1	61	4	38			1	39	4	42
	1	44	4	25			1	36	4	60
	1	78	4	78			1	54	4	40
	1	30	4	47			1	45	4	60
	1	54	4	66			1	50	4	40
	1	43	4	65			1	63	4	58
	1	76	4	43			1	69	4	44
	1	55	4	50			1	53	4	66
	1	70	4	45			1	89	4	62
	1	45	4	26			1	89	4	48
	1	59	5	52			1	79	5	45
	1	78	5	105			1	94	5	24
	1	113	5	75			1	86	5	43
	2	52	5	68			2	70	5	26
	2	85	5	60			2	90	5	43
	2	94	5	45			2	50	5	49
	2	61	5	75			2	94	5	57
	2	66	5	62			2	57	5	48
	2	99	5	26			2	47	5	39
	2	62	5	86			2	54	5	48
	2	98	5	113			2	63	5	40
	2	57	5	67			2	81	5	40
	2	68	5	49			2	93	5	28
	2	83	5	51			2	75	5	26
	2	62	5	32			2	50	5	37
	2	80	5	67			2	65	5	24
	2	91	6	32			2	53	6	29
	2	75	6	57			2	59	6	34
	2	95	6	77			2	56	6	50
	2	82	6	55			2	38	6	53
	2	65	6	44			2	45	6	50
	3	36	6	57			3	37	6	31
	3	50	6	44			3	35	6	65
	3	34	6	42			3	40	6	49
	3	84	6	43			3	45	6	42
	3	60	6	30			3	39	6	48
	3	70	6	66			3	37	6	66
	3	73	6	63			3	55	6	61
	3	52	6	47			3	32	6	57
	3	63	6	79			3	47	6	59
	3	44	6	59			3	44	6	50
	3	62	6	72			3	52	6	42
	3	47					3	42
	3	46					3	51
	3	81					3	40
	3	57					3	94

[truncated: 9 more sheets: Fig.5E-L.WT_1, Fig.5E-L.WT_2, Fig.5E-L.WT_3, Fig.5E-L.MMF_1, Fig.5E-L.MMF_2, Fig.5E-L.MMF_3, Fig.5E-L.Summary, Fig.5O Ctrl, Fig.5O MMF]
